# Supplementary material for: Synthesis of β-hydroxy-1,4-disubstituted-1,2,3-triazoles catalyzed by copper ferrite nanoparticles in tap water using click chemistry
Source: Royal Society of Chemistry journal article supplement (doi:10.1039/c4ra12061b), 2014-01-01

# Synthesis of $\beta$ -Hydroxy-1,4-disubstituted-1,2,3-triazoles catalysed by Copper ferrite nano particles in tap water using Click Chemistry

**B. S. P. Anil Kumar, K. Harsha Vardhan Reddy, G. Satish, R. Uday Kumar and Y. V. D.  
Nageswar\***

*Medicinal Chemistry and Pharmacology Division, Indian Institute of Chemical Technology,*

*Hyderabad-500 007, India*

*E-mail: dryvdnageswar@gmail.com*

## Contents:

|                                                                                         |           |
|-----------------------------------------------------------------------------------------|-----------|
| <b>General Information.....</b>                                                         | <b>2</b>  |
| <b>General Procedure for the Synthesis of 1, 4-Disubstituted 1, 2, 3-triazoles.....</b> | <b>2</b>  |
| <b>Characterization of the CuFe<sub>2</sub>O<sub>4</sub>Nano Catalyst.....</b>          | <b>2</b>  |
| <b>Spectroscopic Data.....</b>                                                          | <b>4</b>  |
| <b>Copies of <sup>1</sup>H &amp; <sup>13</sup>C NMR spectra.....</b>                    | <b>10</b> |

### ***General Information:***

Analytical thin layer chromatography (TLC) was carried out using silica gel 60 F<sub>254</sub> pre-coated plates. Visualization was accomplished with UV lamp or I<sub>2</sub> stain. All products were characterized by their NMR and MS spectra. <sup>1</sup>H and <sup>13</sup>C NMR were recorded on 300 and 75 MHz in CDCl<sub>3</sub> using TMS as the internal standard, Chemical shifts were reported in parts per million (ppm, δ) downfield from tetramethylsilane.

### ***General Procedure for the Synthesis of 1,4-Disubstituted 1, 2, 3-triazoles:***

Styrene Oxide (1 mmol), phenyl acetylene (1 mmol) and NaN<sub>3</sub> (72 mg, 1.1 mmol) were placed in a 25 ml round-bottomed flask in H<sub>2</sub>O (10 mL). Sequentially CuFe<sub>2</sub>O<sub>4</sub> (5 mol%) (Purchase from Aldrich CAS No. 12018-79-0) was added. The reaction mixture was warmed to 60 °C and monitored by TLC until total conversion of the starting materials. After completion of the reaction, the reaction mixture was magnetically concentrated with the aid of a magnet to separate the catalyst. Catalyst was separated and washed several times with acetone, dried under vacuum. Water (30 mL) was added to the resulting reaction mixture followed by extraction with EtOAc (4x10 mL). The collected organic phases were dried with Na<sub>2</sub>SO<sub>4</sub> and the solvent was removed under vacuum to give the corresponding triazole.

### ***Characterization of the CuFe<sub>2</sub>O<sub>4</sub> Nano Catalyst:***

From SEM studies, it is revealed that the CuFe<sub>2</sub>O<sub>4</sub> nanoparticles remained in the same state, even after four cycles.

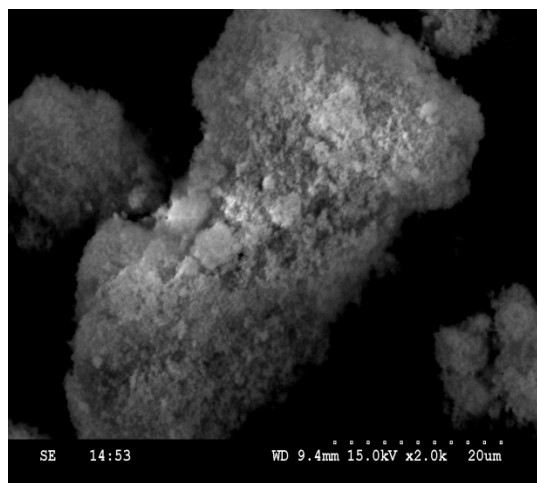

**a.** SEM-analysis of native CuFe<sub>2</sub>O<sub>4</sub> catalyst

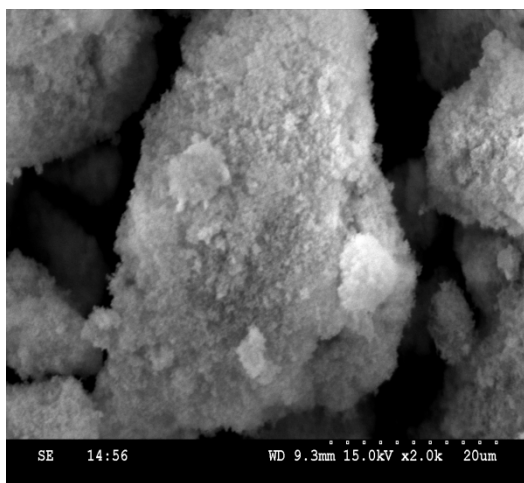

**b.** SEM-analysis of reused CuFe<sub>2</sub>O<sub>4</sub> catalyst after 4 th cycle

### CATALYST A

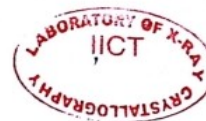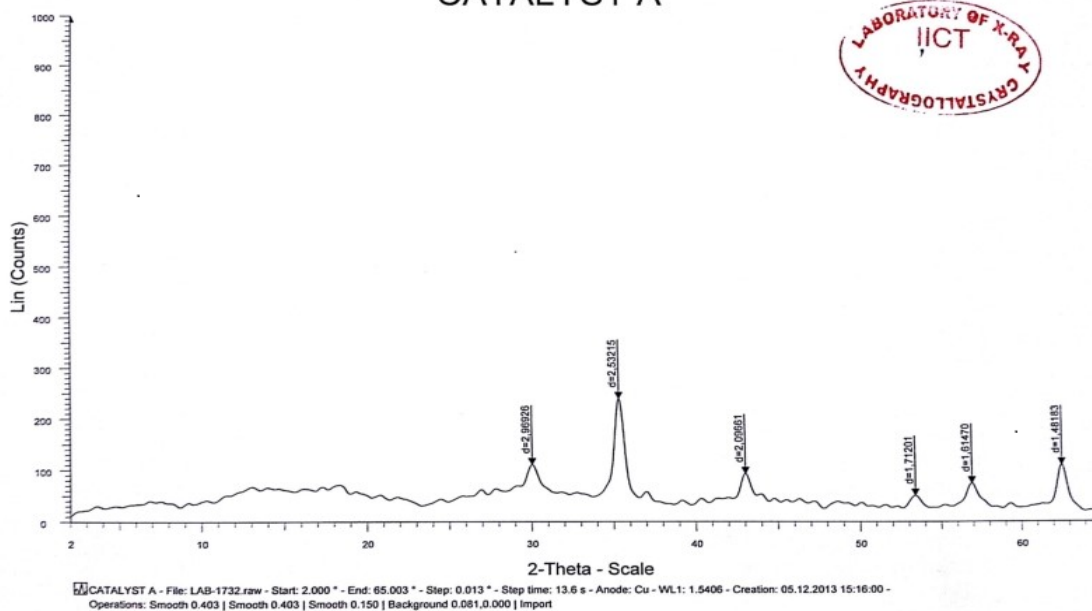

### CATALYST B

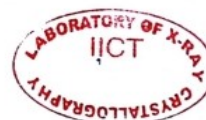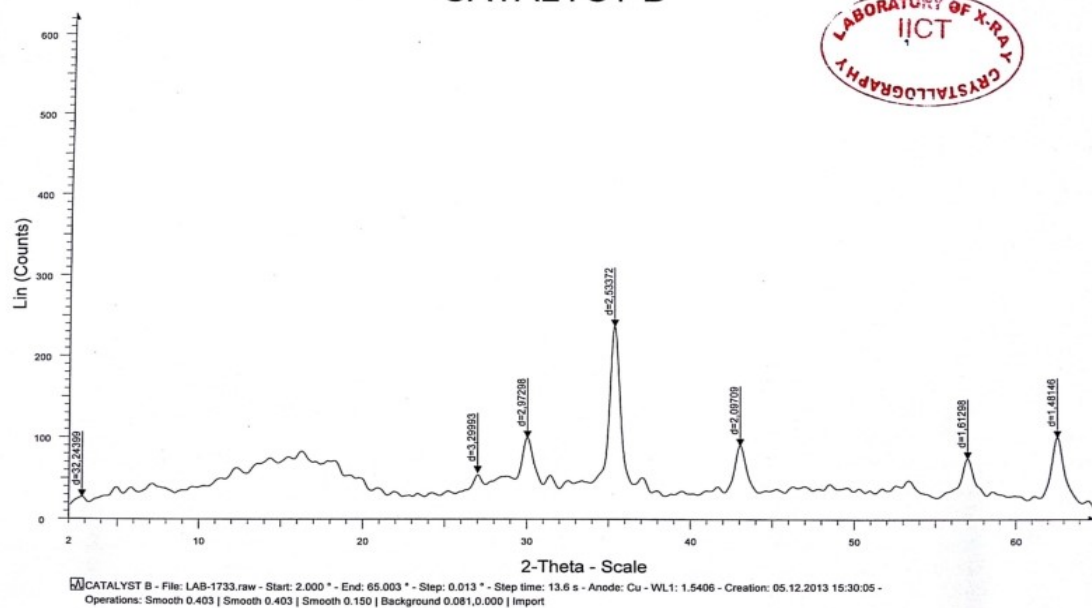

XRD spectra of  $\text{CuFe}_2\text{O}_4$  catalyst (a) native and (b) after the 4<sup>th</sup> cycle.

## Supporting data

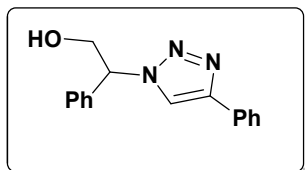

**2-phenyl-2-(4-phenyl-1H-1,2,3-triazol-1-yl)ethanol (Table 1, entry 1)**  $^1\text{H}$  NMR (300 MHz,  $\text{CDCl}_3$ ):  $\delta$  4.24 (1H, dd,  $J = 3.97, 11.93$  Hz), 4.64 (1H, dd,  $J = 7.95, 12.93$  Hz), 5.68 (1H, dd,  $J = 3.97, 7.95$  Hz), 7.20-7.47 (8H, m), 7.70 (1H, s), 7.77 (2H, d,  $J = 7.95$  Hz); ESI-MS:  $m/z$  266 ( $\text{M}+\text{H}$ ) $^+$ . HRMS calcd. For 266.1287 found 266.1282.  $\text{C}_{16}\text{H}_{16}\text{ON}_3$

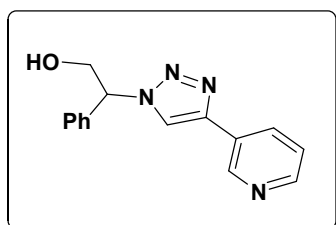

**2-phenyl-2-(4-(pyridin-3-yl)-1H-1,2,3-triazol-1-yl)ethanol (Table 1, entry 2)**  $^1\text{H}$  NMR (300 MHz,  $\text{CDCl}_3$ ):  $\delta$  4.15-4.32 (1H, m), 4.55-4.73 (1H, m), 5.60-5.80 (1H, m), 7.17-7.47 (6H, m), 7.78 (1H, t,  $J = 7.36$  Hz) 8.03-8.38 (2H, m), 8.52 (1H, s);  $^{13}\text{C}$  NMR (75 MHz,  $\text{CDCl}_3$ ):  $\delta$  64.86, 67.33, 122.95, 127.19, 128.91, 129.05, 135.77, 137.11, 147.96, 148.99. ESI-MS:  $m/z$  267 ( $\text{M}+\text{H}$ ) $^+$ . HRMS calcd. For 267.1240 found 267.1235.  $\text{C}_{15}\text{H}_{15}\text{ON}_4$

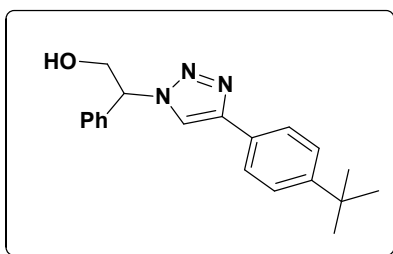

**2-(4-(4-(tert-butyl)phenyl)-1H-1,2,3-triazol-1-yl)-2-phenylethanol (Table 1, entry 3)**  $^1\text{H}$  NMR (300 MHz,  $\text{CDCl}_3$ ):  $\delta$  1.32 (9H, s), 4.20 (1H, dd,  $J = 3.77, 12.08$  Hz), 4.61 (1H, dd,  $J = 8.30, 12.08$  Hz), 5.66 (1H, dd,  $J = 3.77, 8.30$  Hz), 7.13-7.47 (7H, m), 7.66 (3H, d,  $J = 6.79$  Hz);  $^{13}\text{C}$  NMR (75 MHz,  $\text{CDCl}_3$ ):  $\delta$  31.22, 34.61, 65.01, 67.38, 120.28, 125.34, 125.67, 127.07, 127.29, 128.86, 129.05, 136.10, 147.59, 151.34. ESI-MS:  $m/z$  322 ( $\text{M}+\text{H}$ ) $^+$ . HRMS calcd. For 322.1913 found 322.1908.  $\text{C}_{20}\text{H}_{24}\text{ON}_3$

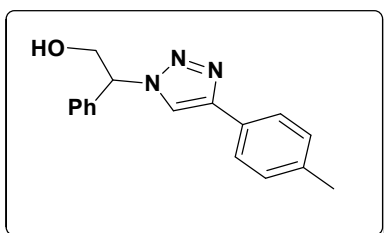

**2-phenyl-2-(4-(p-tolyl)-1H-1,2,3-triazol-1-yl)ethanol (Table 1, entry 4)**  $^1\text{H}$  NMR (300 MHz,  $\text{CDCl}_3$ ):  $\delta$  2.36 (3H, s), 3.52 (1H, s), 4.21 (1H, d,  $J = 11.33$  Hz), 4.51-4.75 (1H, m), 5.59-5.73 (1H, m), 7.05-7.54 (8H, m), 7.65 (2H, t,  $J = 3.60$  Hz); ESI-MS:  $m/z$  280 ( $\text{M}+\text{H}$ ) $^+$ . HRMS calcd. For 280.1444 found 280.1439.  $\text{C}_{17}\text{H}_{18}\text{ON}_3$

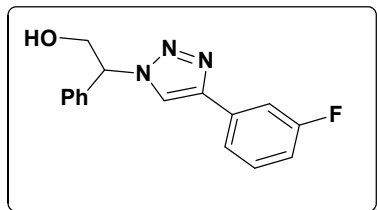

**2-(4-(3-fluorophenyl)-1H-1,2,3-triazol-1-yl)-2-phenylethanol (Table 1, entry 5)**  $^1\text{H}$  NMR (300 MHz,  $\text{CDCl}_3$ ):  $\delta$  3.30 (1H, dd,  $J = 5.28, 8.30$  Hz), 4.10-4.34 (1H, m), 4.51-4.76 (1H, m), 5.67 (1H, dd,  $J = 3.77, 8.30$  Hz), 6.90-7.10 (1H, m), 7.18-7.62 (8H, m), 7.71 (1H, s); ESI-MS:  $m/z$  284 ( $\text{M}+\text{H}$ ) $^+$ . HRMS calcd. For 284.1194 found 284.1189.  $\text{C}_{16}\text{H}_{15}\text{ON}_3\text{F}$

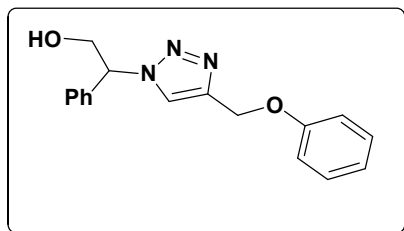

**2-(4-(phoxymethyl)-1H-1,2,3-triazol-1-yl)-2-phenylethanol (Table 1, entry 6)**  $^1\text{H}$  NMR (300 MHz,  $\text{CDCl}_3$ ):  $\delta$  3.4 (1H, s), 4.04-4.29 (1H, m), 4.48-4.69 (1H, m), 5.17 (2H, s), 5.63 (1H, dd,  $J = 3.77, 8.20$  Hz), 6.90-7.04 (3H, m), 7.12-7.46 (7H, m), 7.59 (1H, s);  $^{13}\text{C}$  NMR (75 MHz,  $\text{CDCl}_3$ ):  $\delta$  61.73, 64.79, 67.18, 114.64, 121.22, 123.58, 127.05, 128.35, 128.89, 129.03, 129.46, 135.80, 143.99, 158.04. ESI-MS:  $m/z$  296 ( $\text{M}+\text{H}$ ) $^+$ . HRMS calcd. For 296.1393 found 296.1385.  $\text{C}_{17}\text{H}_{18}\text{O}_2\text{N}_3$

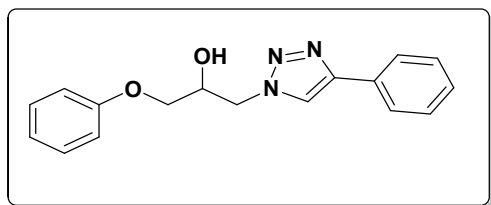

**1-phenoxy-3-(4-phenyl-1H-1,2,3-triazol-1-yl)propan-2-ol (Table 1, entry 7)**  $^1\text{H}$  NMR (300 MHz,  $\text{CDCl}_3$ ):  $\delta$  3.96-4.12 (2H, m), 4.43-4.62 (2H, m), 4.64-4.80 (1H, m), 6.78-7.06 (3H, m), 7.14-7.44 (5H, m), 7.54-7.73 (2H, m), 7.83 (1H, s);  $^{13}\text{C}$  NMR (75 MHz,  $\text{CDCl}_3$ ):  $\delta$  53.36, 68.70, 68.81, 114.44, 121.38, 121.42, 125.44, 128.10, 128.74, 129.74, 129.95, 147.27, 158.07. ESI-MS:  $m/z$  296 ( $\text{M}+\text{H}$ ) $^+$ . HRMS calcd. For 296.1393 found 296.1389.  $\text{C}_{17}\text{H}_{18}\text{O}_2\text{N}_3$

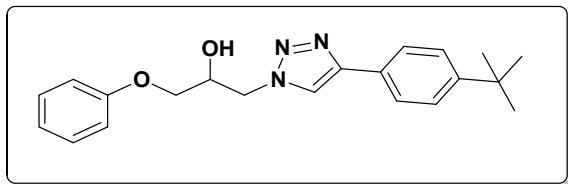

**1-(4-(4-(tert-butyl)phenyl)-1H-1,2,3-triazol-1-yl)-3-phenoxypropan-2-ol (Table 1, entry 8)**  $^1\text{H}$  NMR (300 MHz,  $\text{CDCl}_3$ ):  $\delta$  1.34 (9H, s), 3.55 (1H, s), 3.96-4.14 (2H, m), 4.47-4.62 (2H, m), 4.71 (1H, dd,  $J = 2.44, 13.27$  Hz), 6.85-7.04 (3H, m), 7.21-7.49 (4H, m), 7.61-7.73 (2H, m), 7.84 (1H, s);  $^{13}\text{C}$  NMR (75 MHz,  $\text{CDCl}_3$ ):  $\delta$  31.25, 34.61, 53.29, 68.80, 114.47, 121.10, 125.66, 127.19, 129.58, 147.29, 151.21, 158.09. ESI-MS:  $m/z$  352 ( $\text{M}+\text{H}$ ) $^+$ . HRMS calcd. For 352.2019 found 352.2012.  $\text{C}_{21}\text{H}_{26}\text{O}_2\text{N}_3$

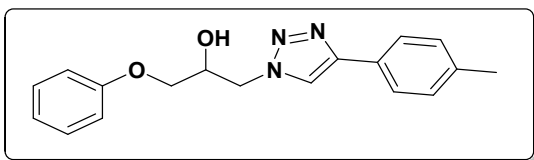

**1-phenoxy-3-(4-(p-tolyl)-1H-1,2,3-triazol-1-yl)propan-2-ol (Table 1, entry 9)**  $^1\text{H}$  NMR (300 MHz,  $\text{CDCl}_3$ ):  $\delta$  2.36 (3H, s), 4.02 (2H, dd,  $J = 2.26, 4.72$  Hz), 4.44-4.61 (2H, m), 4.64-4.77 (1H, m), 6.78-7.05 (3H, m), 7.12-7.37 (4H, m), 7.60 (2H, d,  $J = 8.12$  Hz), 7.81 (1H, s);  $^{13}\text{C}$  NMR (75 MHz,  $\text{CDCl}_3$ ):  $\delta$  21.18, 53.32, 68.61, 68.81, 114.41, 120.99, 121.11, 121.27, 125.35, 127.12, 129.35, 129.48, 137.91, 147.28, 158.08. ESI-MS:  $m/z$  310 ( $\text{M}+\text{H}$ ) $^+$ , 332 ( $\text{M}+\text{Na}$ ). HRMS calcd. For 310.1550 found 310.1546.  $\text{C}_{18}\text{H}_{20}\text{O}_2\text{N}_3$

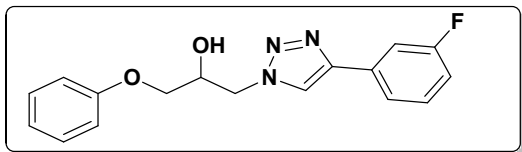

**1-(4-(3-fluorophenyl)-1H-1,2,3-triazol-1-yl)-3-phenoxypropan-2-ol (Table 1, entry 10)**  $^1\text{H}$  NMR (300 MHz,  $\text{CDCl}_3$ ):  $\delta$  3.96-4.13 (2H, m), 4.46-4.63 (2H, m), 4.65-4.80 (1H, m), 6.79-7.08 (4H, m), 7.17-7.55 (5H, m), 7.86-7.90 (1H, m);  $^{13}\text{C}$  NMR (75 MHz,  $\text{CDCl}_3$ ):  $\delta$  53.36, 63.58, 68.72, 112.20, 112.50, 114.42, 114.83, 115.11, 121.04, 121.47, 121.83, 130.30, 130.41, 146.25, 158.01, 161.36, 164.61. ESI-MS:  $m/z$  314 ( $\text{M}+\text{H}$ ) $^+$ .

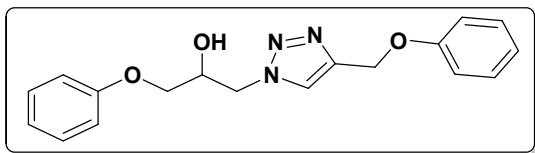

**1-phenoxy-3-(4-(phoxymethyl)-1H-1,2,3-triazol-1-yl)propan-2-ol (Table 1, entry 11)**  $^1\text{H}$  NMR (300 MHz,  $\text{CDCl}_3$ ):  $\delta$  3.84-4.14 (2H, m), 4.38-4.76 (3H, m), 5.15 (2H, t,  $J = 19.87$  Hz), 6.76-7.07 (6H, m), 7.18-7.40 (4H, m), 7.75 (1H, t,  $J = 19.98$  Hz);  $^{13}\text{C}$  NMR (75 MHz,  $\text{CDCl}_3$ ):  $\delta$  53.00, 61.60, 68.63, 68.67, 114.42, 114.64, 121.20, 121.40, 124.42, 129.45, 129.50, 143.84, 157.95, 158.01. ESI-MS:  $m/z$  326 ( $\text{M}+\text{H}$ ) $^+$ . HRMS calcd. For 326.1499 found 326.1494.  $\text{C}_{18}\text{H}_{20}\text{O}_3\text{N}_3$

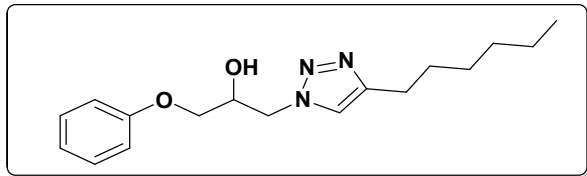

**1-(4-hexyl-1H-1,2,3-triazol-1-yl)-3-phenoxypropan-2-ol (Table 1, entry 12)**  $^1\text{H}$  NMR (300 MHz,  $\text{CDCl}_3$ ):  $\delta$  0.86 (3H, s), 1.27 (6H, s), 1.60 (2H, s), 2.63 (2H, s), 3.95 (2H, s), 4.30-4.77 (3H, m), 6.71-7.04 (3H, m), 7.12-7.49 (3H, m);  $^{13}\text{C}$  NMR (75 MHz,  $\text{CDCl}_3$ ):  $\delta$  13.88, 22.34, 25.27, 28.71, 29.06, 31.33, 52.82, 68.33, 68.63, 114.25, 121.06, 122.36, 129.31, 147.77, 158.00. ESI-MS:  $m/z$  304 ( $\text{M}+\text{H}$ ) $^+$ . HRMS calcd. For 304.2019 found 304.2013.  $\text{C}_{17}\text{H}_{26}\text{O}_2\text{N}_3$

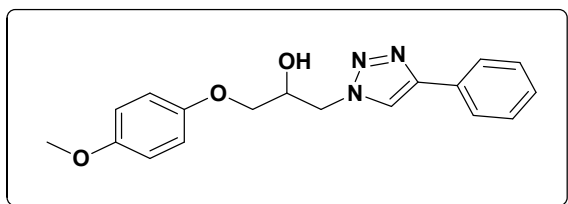

**1-(4-methoxyphenoxy)-3-(4-phenyl-1H-1,2,3-triazol-1-yl)propan-2-ol (Table 1, entry 13)**  $^1\text{H}$  NMR (300 MHz,  $\text{CDCl}_3$ ):  $\delta$  3.52 (1H, d,  $J = 4.72$  Hz), 3.76 (3H, s), 3.91-4.10 (2H, m), 4.40-4.63 (2H, m), 4.70 (1H, dd,  $J = 2.83, 13.40$  Hz), 6.85 (4H, s), 7.21-7.47 (3H, m), 7.76 (2H, d,  $J = 6.98$  Hz), 7.87 (1H, s);  $^{13}\text{C}$  NMR (75 MHz,  $\text{CDCl}_3$ ):  $\delta$  53.01, 53.70, 68.98, 69.56, 114.74, 115.56, 121.27, 125.61, 128.17, 128.80, 130.23, 147.61, 152.18, 154.38. ESI-MS:  $m/z$  326 ( $\text{M}+\text{H}$ ) $^+$ . HRMS calcd. For 326.1499 found 326.1492.  $\text{C}_{18}\text{H}_{20}\text{O}_2\text{N}_3$

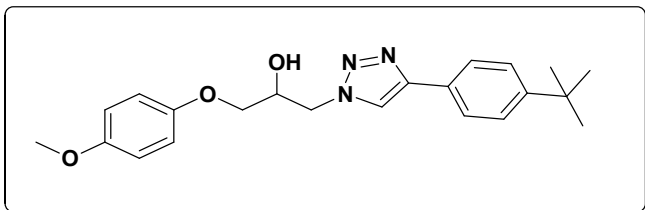

**1-(4-(4-(tert-butyl)phenyl)-1H-1,2,3-triazol-1-yl)-3-(4-methoxyphenoxy)propan-2-ol (Table 1, entry 14)**  $^1\text{H}$  NMR (300 MHz,  $\text{CDCl}_3$ ):  $\delta$  1.33 (9H, s), 3.76 (3H, s), 3.91-4.07 (2H, m), 4.43-4.59 (2H, m), 4.62-4.78 (1H, m), 6.83 (4H, dd,  $J = 5.85, 7.17$  Hz), 7.41 (2H, d,  $J = 8.30$  Hz), 7.62 (2H, d,  $J = 8.30$  Hz), 7.82 (1H, s);  $^{13}\text{C}$  NMR (75 MHz,  $\text{CDCl}_3$ ):  $\delta$  31.25, 34.60, 53.26, 55.67, 68.86, 69.66, 114.69, 115.53, 121.07, 125.23, 125.64, 127.25, 147.35, 151.18, 152.28, 154.28. ESI-MS:  $m/z$  382 ( $\text{M}+\text{H}$ ) $^+$ . HRMS calcd. For 382.2125 found 382.2123.  $\text{C}_{22}\text{H}_{28}\text{O}_3\text{N}_3$

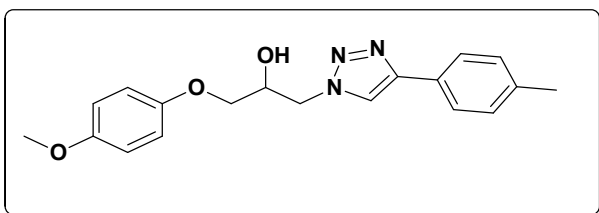

**1-(4-methoxyphenoxy)-3-(4-(p-tolyl)-1H-1,2,3-triazol-1-yl)propan-2-ol (Table 1, entry 15)**  $^1\text{H}$  NMR (300 MHz,  $\text{CDCl}_3$ ):  $\delta$  2.36 (3H, s), 3.76 (4H, s), 3.90-4.03 (2H, m), 4.42-4.61 (2H, m), 4.68 (1H, dd,  $J = 2.74, 13.58$  Hz), 6.79-6.85 (4H, m), 7.19 (2H, d,  $J = 7.78$  Hz), 7.61 (2H, d,  $J = 7.78$  Hz), 7.82 (1H, s);  $^{13}\text{C}$  NMR (75 MHz,  $\text{CDCl}_3$ ):  $\delta$  21.22, 53.17, 55.66, 68.83, 69.64, 114.67, 115.52,

121.02, 125.45, 127.30, 129.41, 137.96, 147.47. ESI-MS:  $m/z$  340 (M+H)<sup>+</sup>, 362 (M+Na). HRMS calcd. For 340.1655 found 340.1653. C<sub>22</sub>H<sub>28</sub>O<sub>3</sub>N<sub>3</sub>

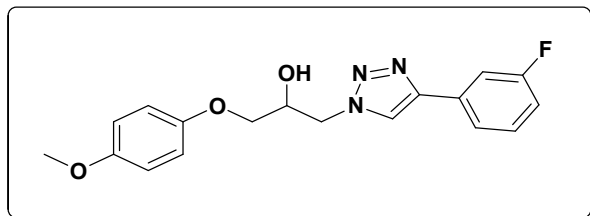

**1-(4-(3-fluorophenyl)-1H-1,2,3-triazol-1-yl)-3-(4-methoxyphenoxy)propan-2-ol (Table 1, entry 16)**  
<sup>1</sup>H NMR (300 MHz, CDCl<sub>3</sub>): δ 3.76 (3H, s), 3.91-4.06 (2H, m), 4.42-4.60 (2H, m), 4.70 (1H, dd,  $J$  = 2.74, 13.42 Hz), 6.76-6.91 (4H, m), 6.94-7.01 (1H, m), 7.30-7.36 (1H, m), 7.42-7.44 (1H, m), 7.47-7.51 (1H, m), 7.88 (1H, s); <sup>13</sup>C NMR (75 MHz, CDCl<sub>3</sub>): δ 53.32, 55.65, 68.81, 69.58, 112.21, 112.52, 114.67, 115.10, 115.47, 121.06, 121.79, 130.30, 132.11, 146.28, 152.17, 154.28, 161.37, 164.63. ESI-MS:  $m/z$  344 (M+H)<sup>+</sup>. HRMS calcd. For 344.1405 found 344.1400. C<sub>18</sub>H<sub>19</sub>O<sub>3</sub>N<sub>3</sub>F

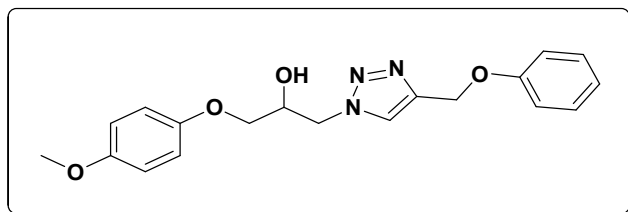

**1-(4-methoxyphenoxy)-3-(4-(phoxymethyl)-1H-1,2,3-triazol-1-yl)propan-2-ol (Table 1, entry 17)**  
<sup>1</sup>H NMR (300 MHz, CDCl<sub>3</sub>): δ 3.76 (3H, s), 3.83-4.02 (2H, m), 4.35-4.59 (2H, m), 4.67 (1H, dd,  $J$  = 3.58, 13.97 Hz), 5.20 (2H, s), 6.82 (4H, s), 6.91-7.02 (3H, m), 7.22-7.33 (2H, m), 7.76 (1H, s); <sup>13</sup>C NMR (75 MHz, CDCl<sub>3</sub>): δ 52.98, 55.50, 68.53, 69.47, 114.55, 115.39, 121.13, 124.48, 129.37, 143.59, 152.08, 154.06, 157.94. ESI-MS:  $m/z$  356 (M+H)<sup>+</sup>. HRMS calcd. For 356.1604 found 356.1602. C<sub>19</sub>H<sub>22</sub>O<sub>4</sub>N<sub>3</sub>

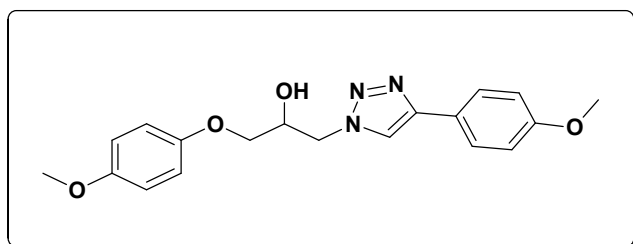

**1-(4-methoxyphenoxy)-3-(4-(4-methoxyphenyl)-1H-1,2,3-triazol-1-yl)propan-2-ol (Table 1, entry 18)**  
<sup>1</sup>H NMR (300 MHz, CDCl<sub>3</sub>): δ 3.76 (3H, s), 3.91-4.04 (2H, m), 4.45-4.58 (2H, m), 4.63-4.75 (1H, m), 6.73-6.98 (6H, m), 7.60-7.67 (2H, m), 7.77 (1H, s); ESI-MS:  $m/z$  356 (M+H)<sup>+</sup>. HRMS calcd. For 356.1604 found 356.1599. C<sub>19</sub>H<sub>22</sub>O<sub>4</sub>N<sub>3</sub>

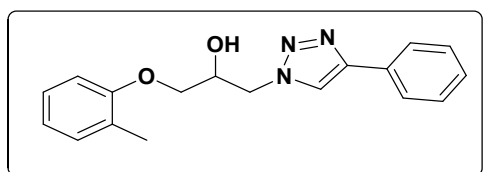



**1-(4-phenyl-1H-1,2,3-triazol-1-yl)-3-(o-tolyloxy)propan-2-ol** (Table 1, entry 19)  $^1\text{H}$  NMR (300 MHz,  $\text{CDCl}_3$ ):  $\delta$  2.25 (3H, s), 4.05 (2H, d,  $J = 5.49$  Hz), 4.48-4.57 (2H, m), 4.72 (1H, dd,  $J = 1.83, 13.73$  Hz), 6.80 (1H, d,  $J = 8.39$  Hz), 6.89 (1H, t,  $J = 7.32$  Hz), 7.14 (2H, t,  $J = 7.32$  Hz), 7.27-7.36 (3H, m), 7.59-7.72 (2H, m), 7.83 (1H, s);  $^{13}\text{C}$  NMR (75 MHz,  $\text{CDCl}_3$ ):  $\delta$  16.23, 53.58, 68.75, 68.96, 111.04, 121.03, 121.42, 125.39, 126.55, 126.87, 128.06, 128.71, 129.91, 130.74, 147.17, 156.14. ESI-MS:  $m/z$  310 ( $\text{M}+\text{H}$ ) $^+$ . HRMS calcd. For 310.1550 found 310.1543.  $\text{C}_{18}\text{H}_{20}\text{O}_2\text{N}_3$

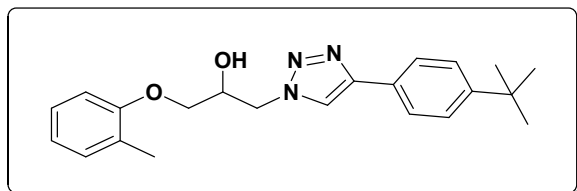

**1-(4-(4-(tert-butyl)phenyl)-1H-1,2,3-triazol-1-yl)-3-(o-tolyloxy)propan-2-ol** (Table 1, entry 20)  $^1\text{H}$  NMR (300 MHz,  $\text{CDCl}_3$ ):  $\delta$  1.33 (9H, s), 2.16 (3H, s), 4.04 (2H, d,  $J = 5.09$  Hz), 4.44-4.62 (2H, m), 4.72 (1H, d,  $J = 10.95$  Hz), 6.72-6.96 (2H, m), 7.04-7.21 (2H, m), 7.37 (2H, d,  $J = 8.30$  Hz), 7.55-7.72 (2H, m), 7.82 (1H, s);  $^{13}\text{C}$  NMR (75 MHz,  $\text{CDCl}_3$ ):  $\delta$  16.25, 31.19, 34.54, 53.58, 68.75, 68.99, 111.04, 120.98, 121.14, 126.87, 130.73, 147.16, 151.09, 156.17. ESI-MS:  $m/z$  366 ( $\text{M}+\text{H}$ ) $^+$ . HRMS calcd. For 366.2176 found 366.2169.  $\text{C}_{22}\text{H}_{28}\text{O}_2\text{N}_3$

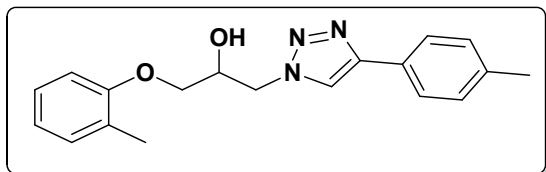

**1-(4-(p-tolyl)-1H-1,2,3-triazol-1-yl)-3-(o-tolyloxy)propan-2-ol** (Table 1, entry 21)  $^1\text{H}$  NMR (300 MHz,  $\text{CDCl}_3$ ):  $\delta$  2.25 (3H, s), 2.36, (3H, s), 4.02 (2H, d,  $J = 5.18$  Hz), 4.44-4.62 (2H, m), 4.65-4.80 (1H, m), 6.80 (1H, d,  $J = 8.24$  Hz), 6.90 (1H, t,  $J = 7.47$  Hz), 7.09-7.24 (4H, m), 7.51-7.67 (2H, m), 7.73-7.87 (1H, m);  $^{13}\text{C}$  NMR (75 MHz,  $\text{CDCl}_3$ ):  $\delta$  16.23, 21.22, 53.32, 68.93, 111.18, 121.00, 121.15, 125.48, 126.60, 126.93, 127.32, 129.41, 130.80, 137.98, 147.53, 156.14. ESI-MS:  $m/z$  324 ( $\text{M}+\text{H}$ ) $^+$ . HRMS calcd. For 324.1706 found 324.1701.  $\text{C}_{19}\text{H}_{22}\text{O}_2\text{N}_3$

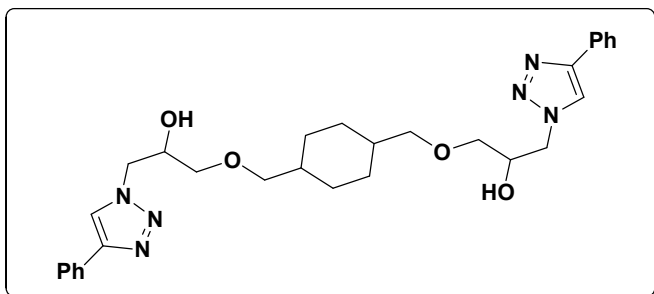

**3,3'-((cyclohexane-1,4-diylbis(methylene))bis(oxy))bis(1-(4-phenyl-1H-1,2,3-triazol-1-yl)propan-2-ol)** (Table 1, entry 22)  $^1\text{H}$  NMR (300 MHz,  $\text{CDCl}_3$ ):  $\delta$  0.75-1.06 (4H, m), 1.78 (4H, m), 1.99-2.12 (2H, m), 3.09-3.95 (12H, m), 4.10 (1H, dd,  $J = 6.86, 14.03$  Hz), 4.25 (1H, s), 4.35-4.45 (1H, m), 4.59 (1H, d,  $J = 14.03$  Hz), 7.17-7.52 (6H, m), 7.64-8.00 (6H, m); ESI-MS:  $m/z$  547 ( $\text{M}+\text{H}$ ) $^+$ . HRMS calcd. For 547.3027 found 547.3016.  $\text{C}_{30}\text{H}_{39}\text{O}_4\text{N}_6$

**Copies of  $^1\text{H}$  &  $^{13}\text{C}$  NMR spectra:**

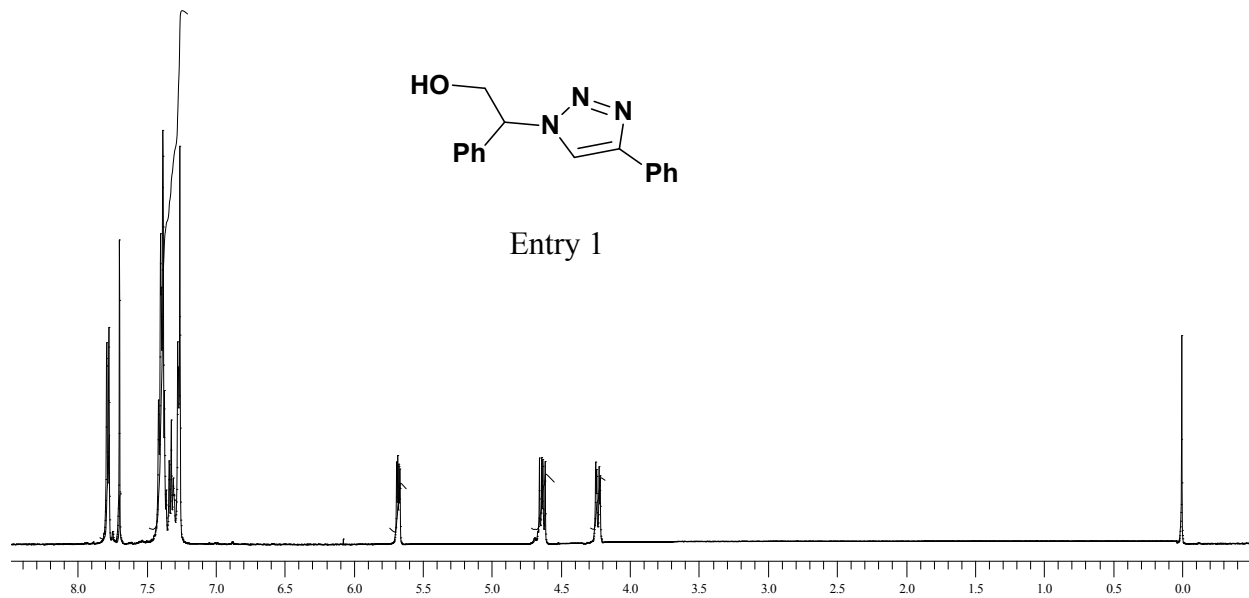

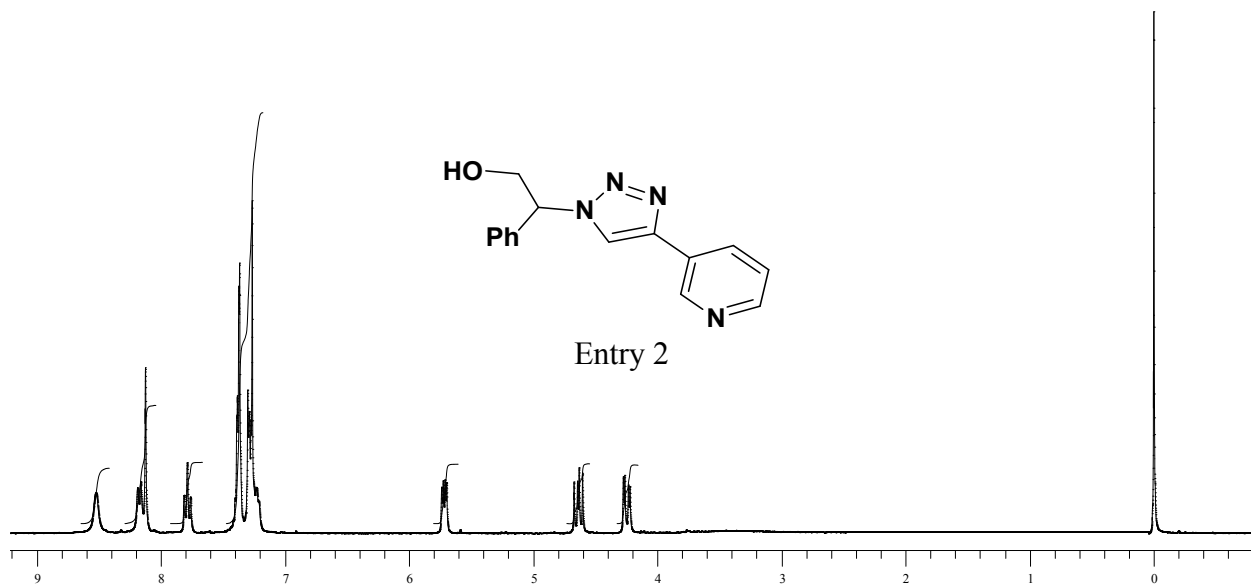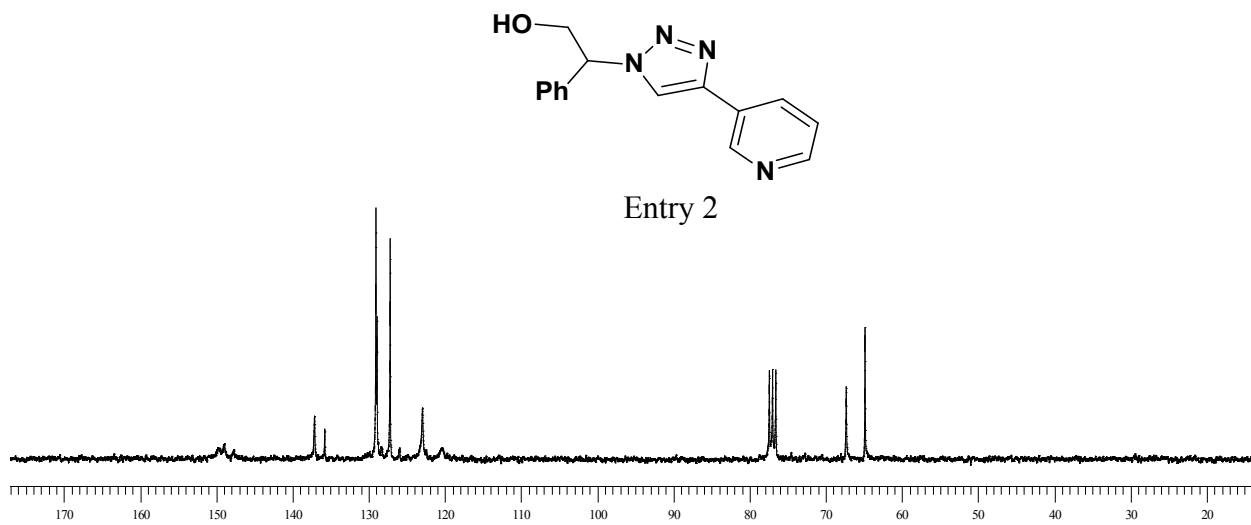

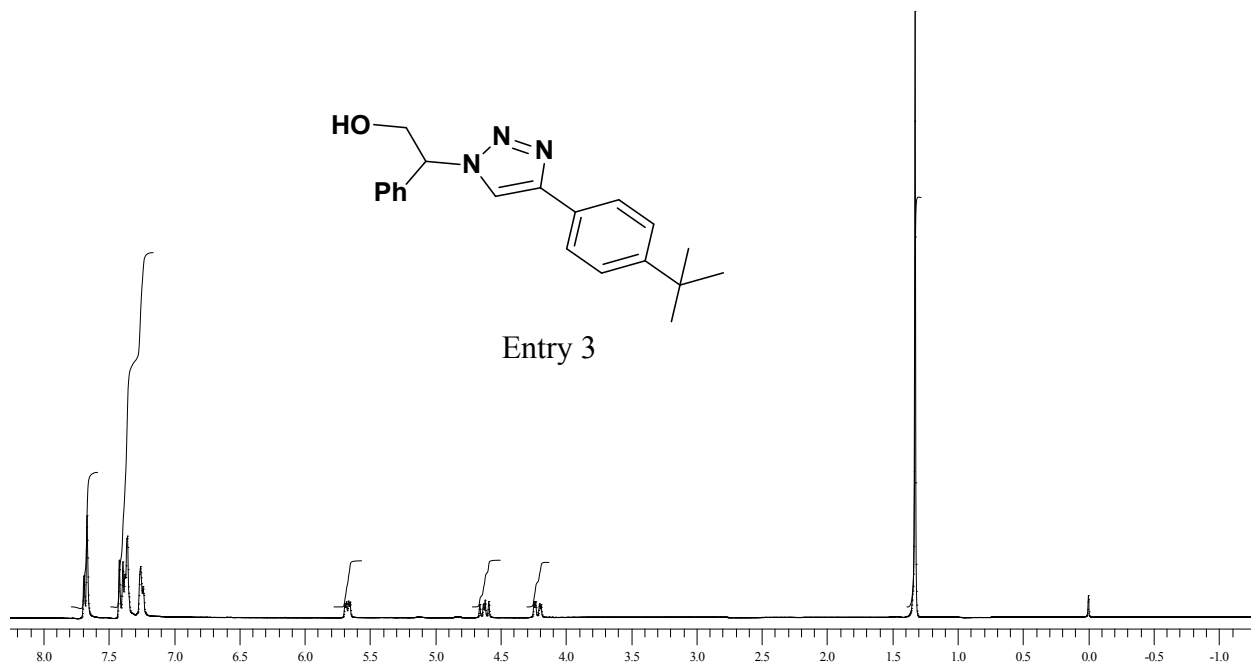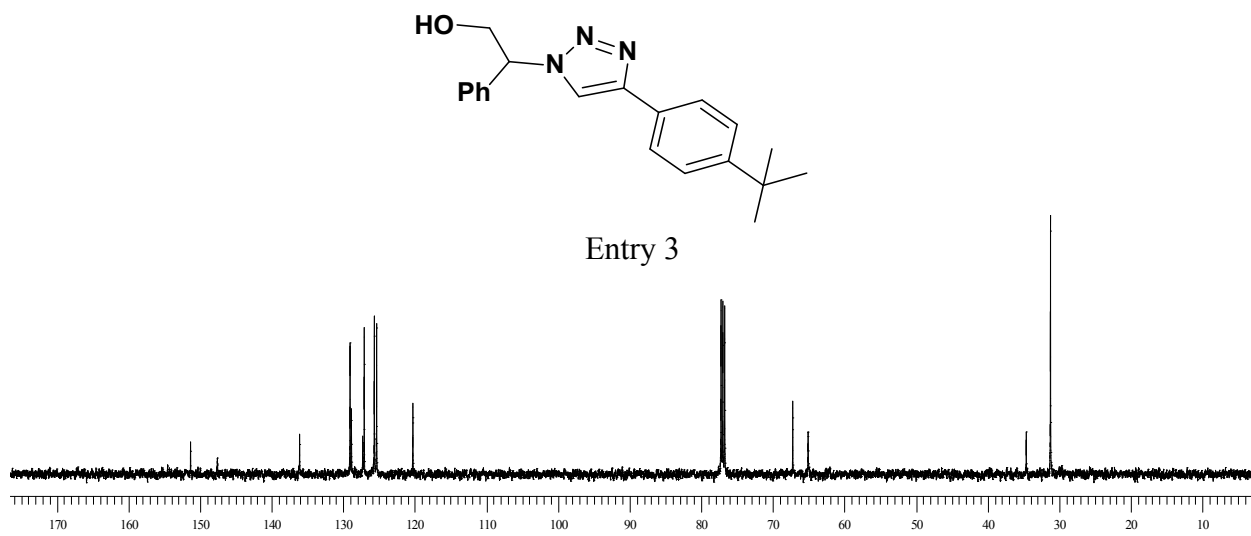

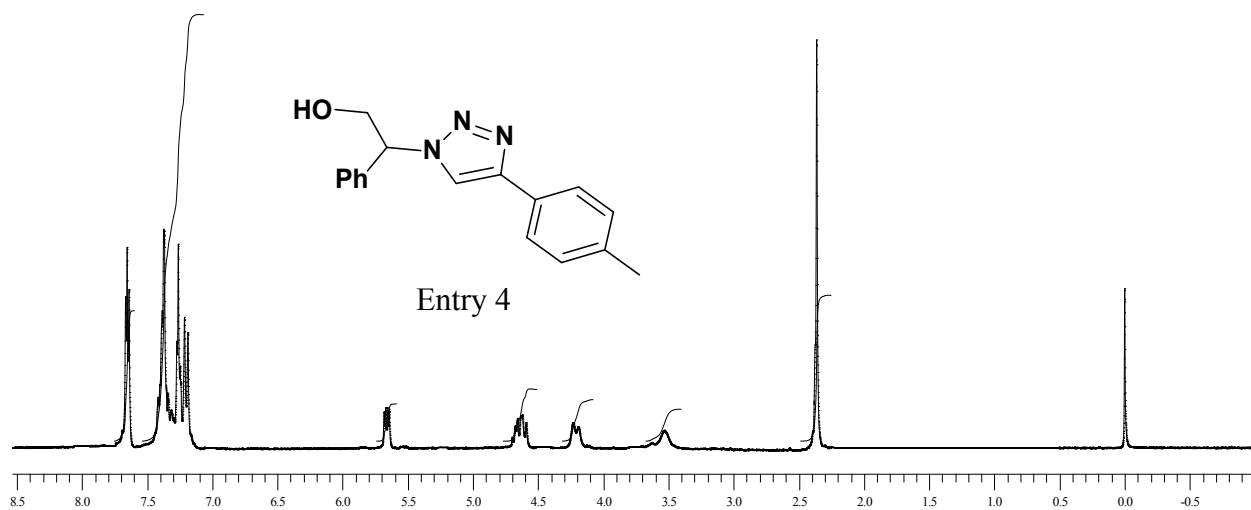

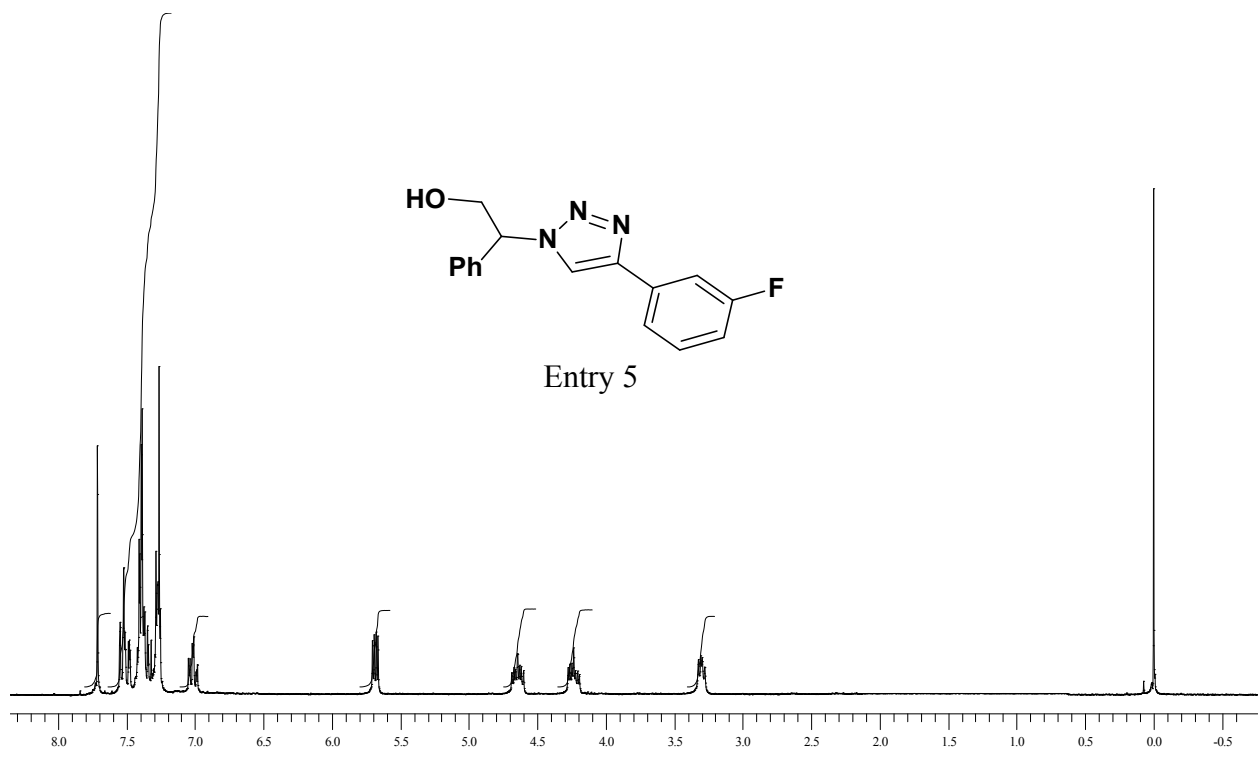

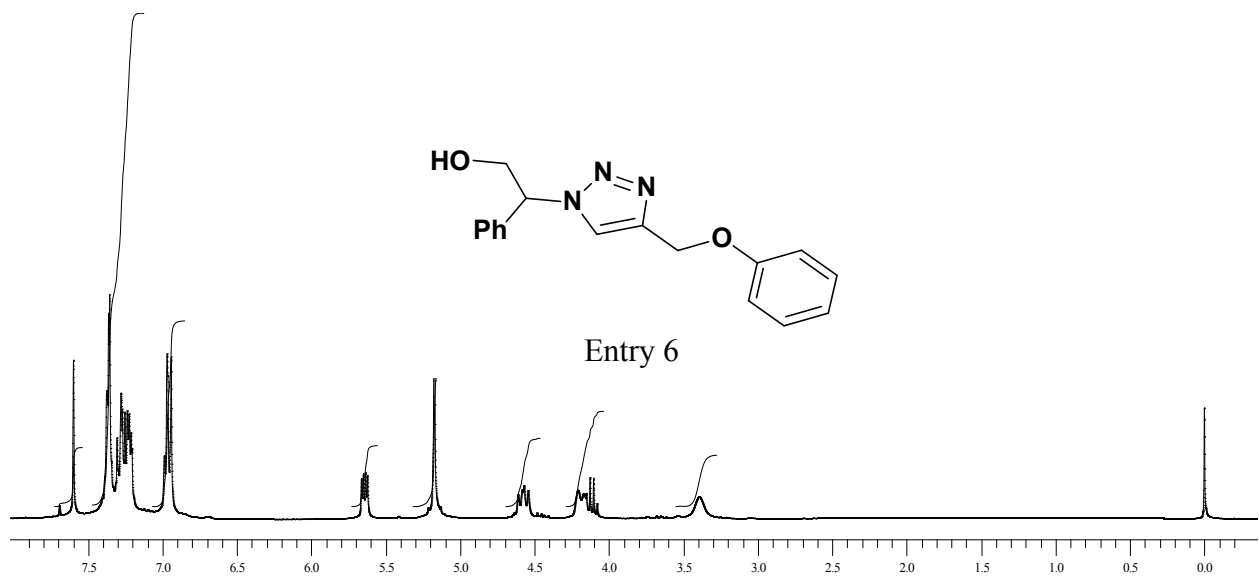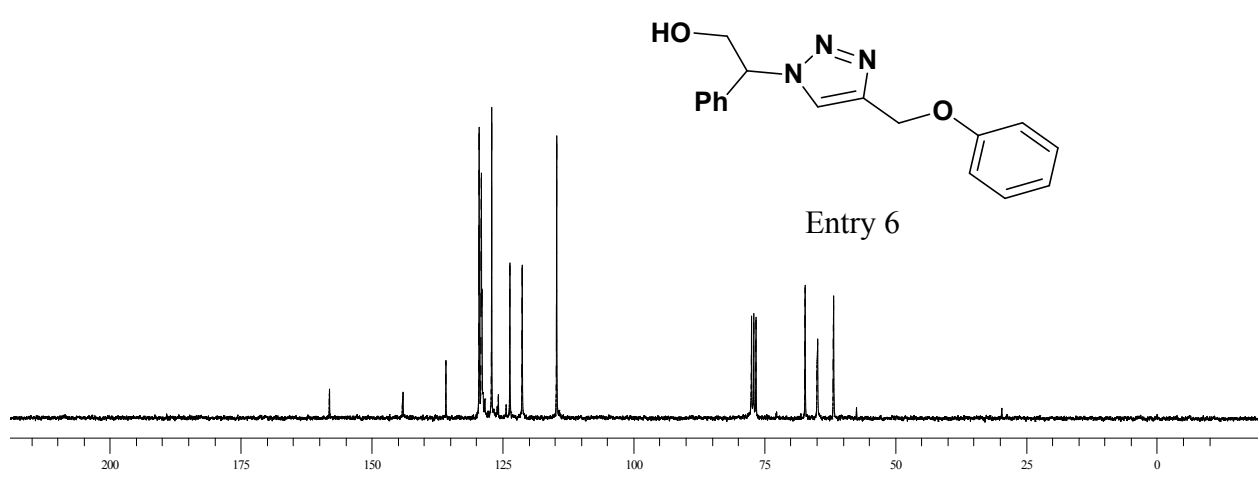

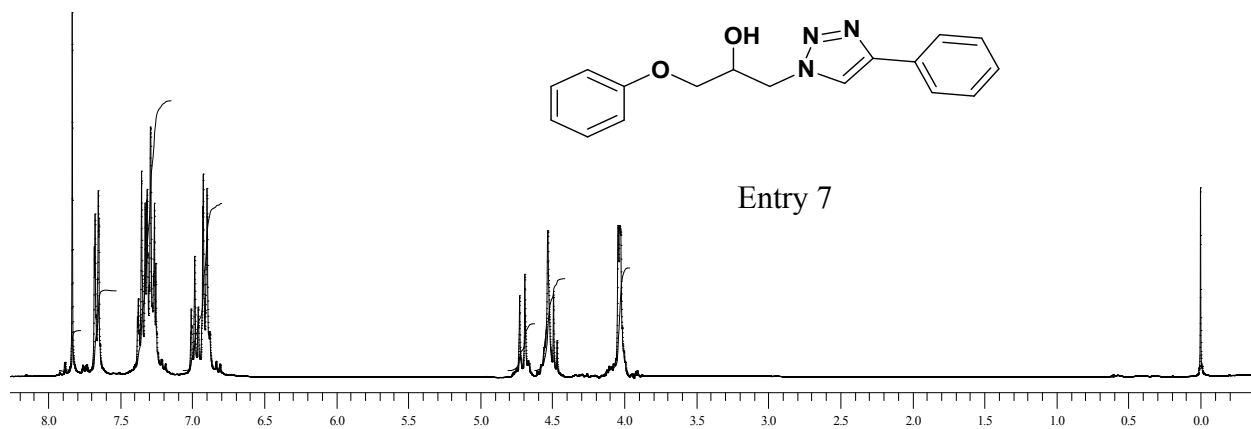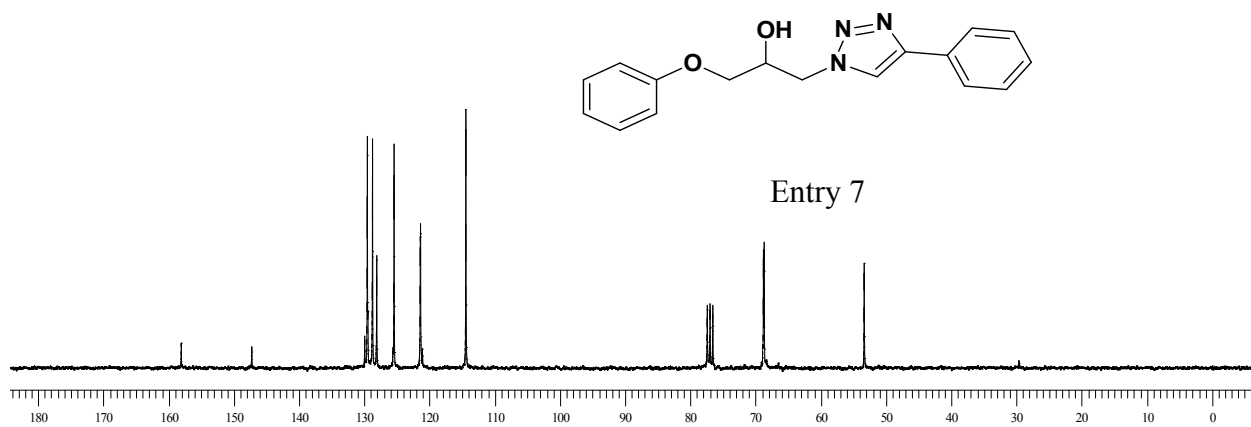



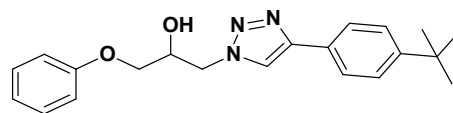

Entry 8

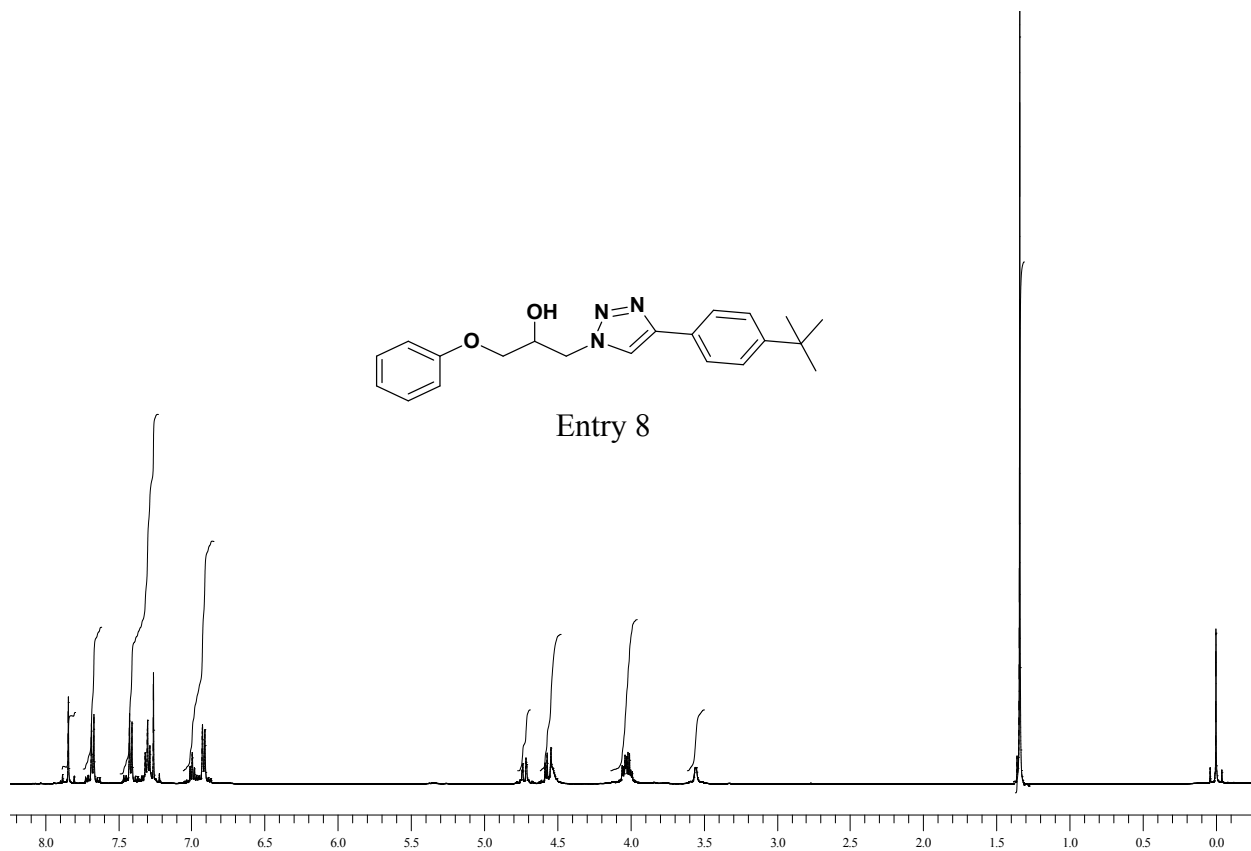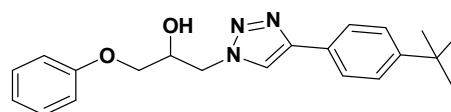

Entry 8

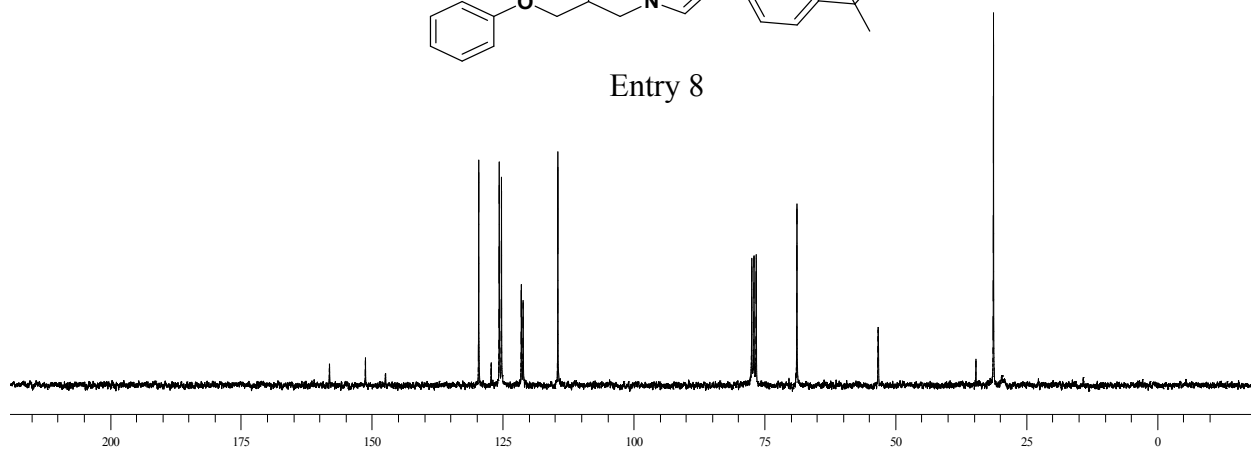

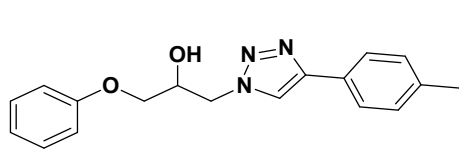

Entry 9

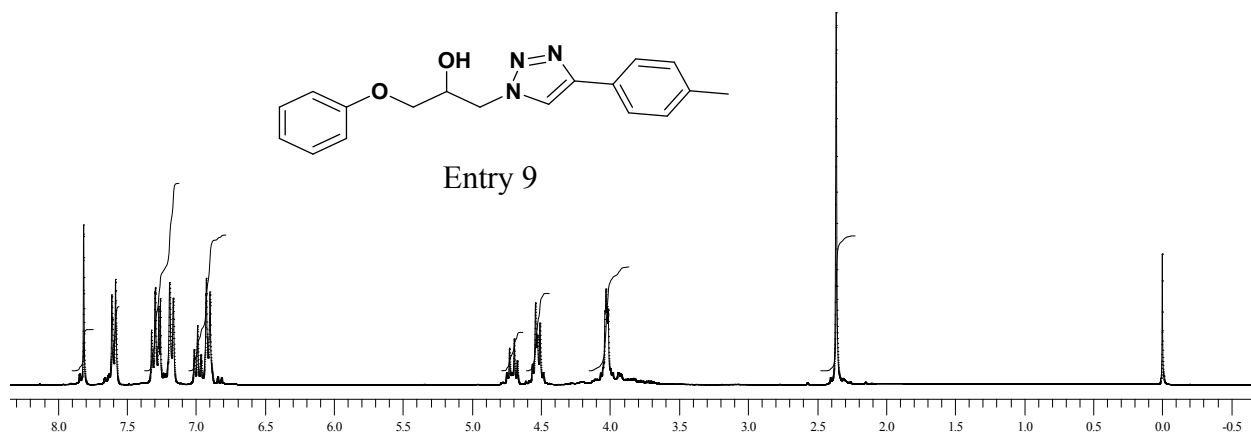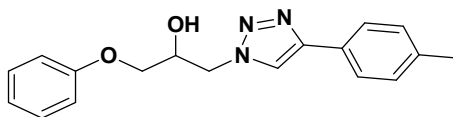

Entry 9

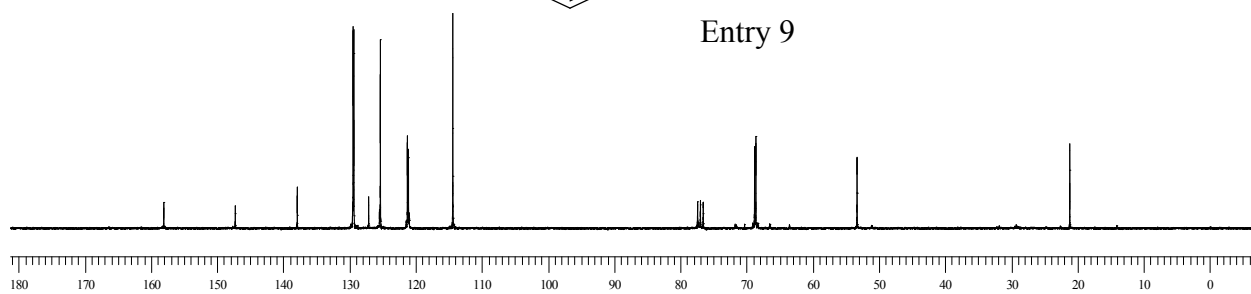

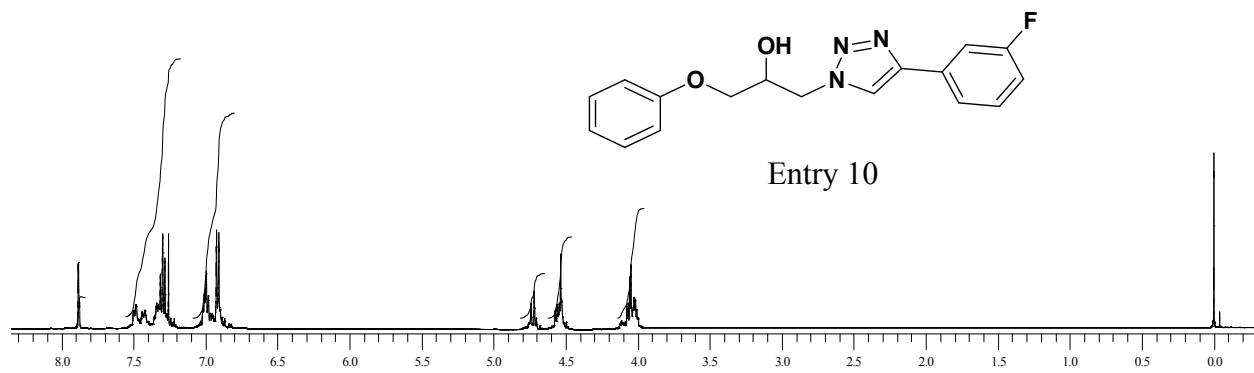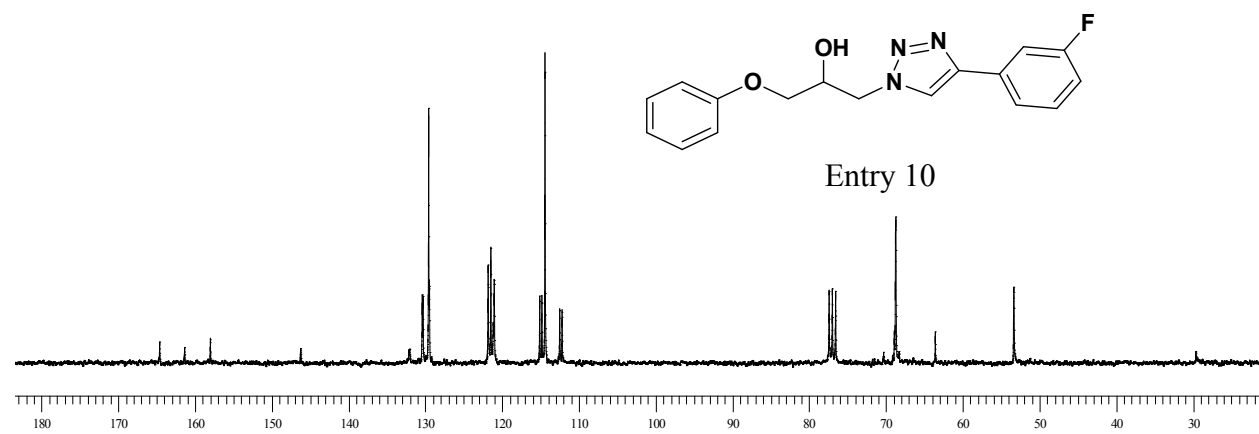

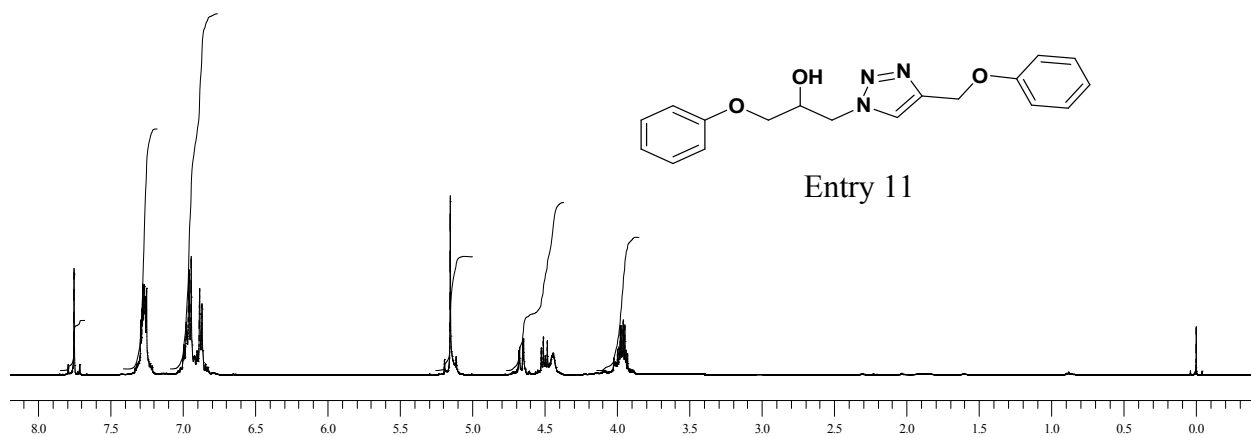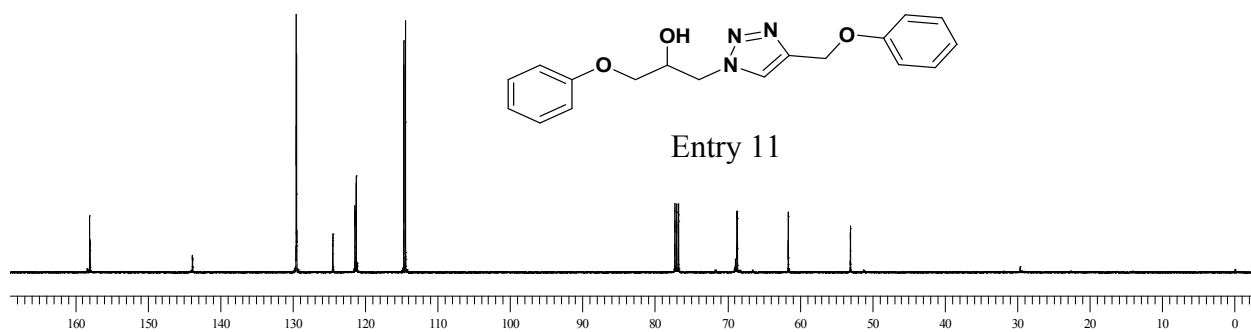

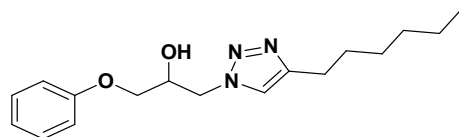

Entry 12

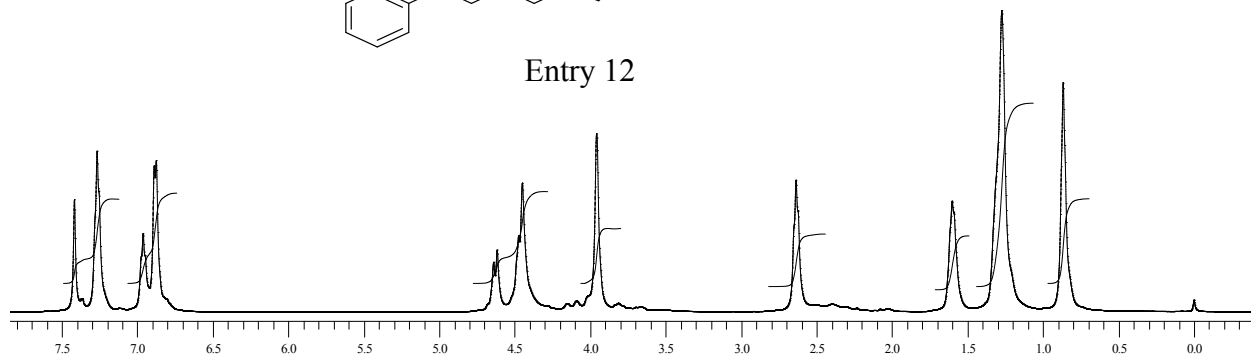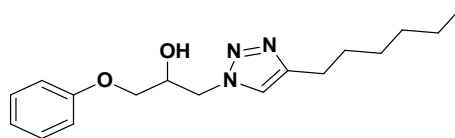

Entry 12

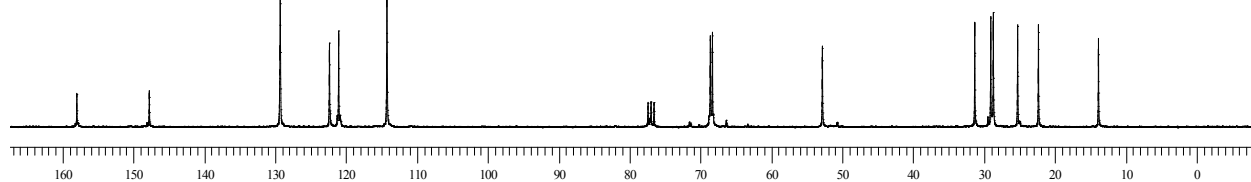

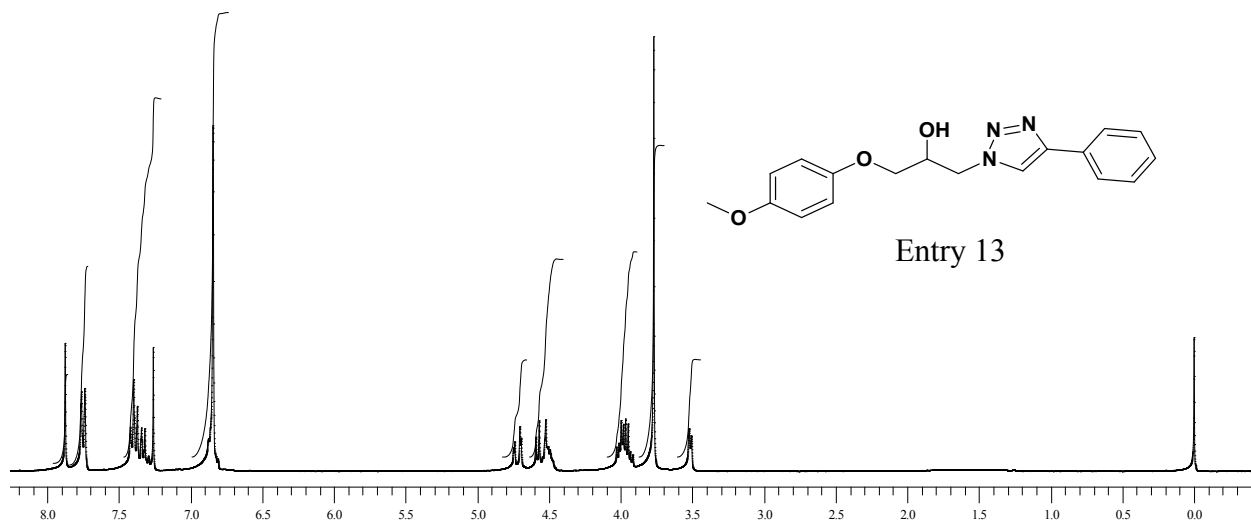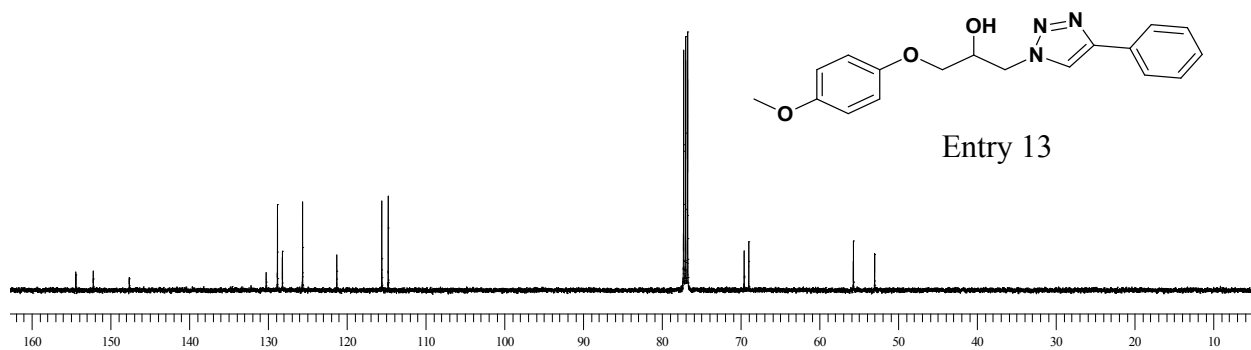

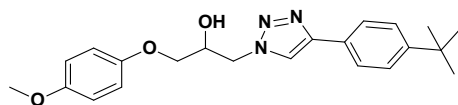

Entry 14

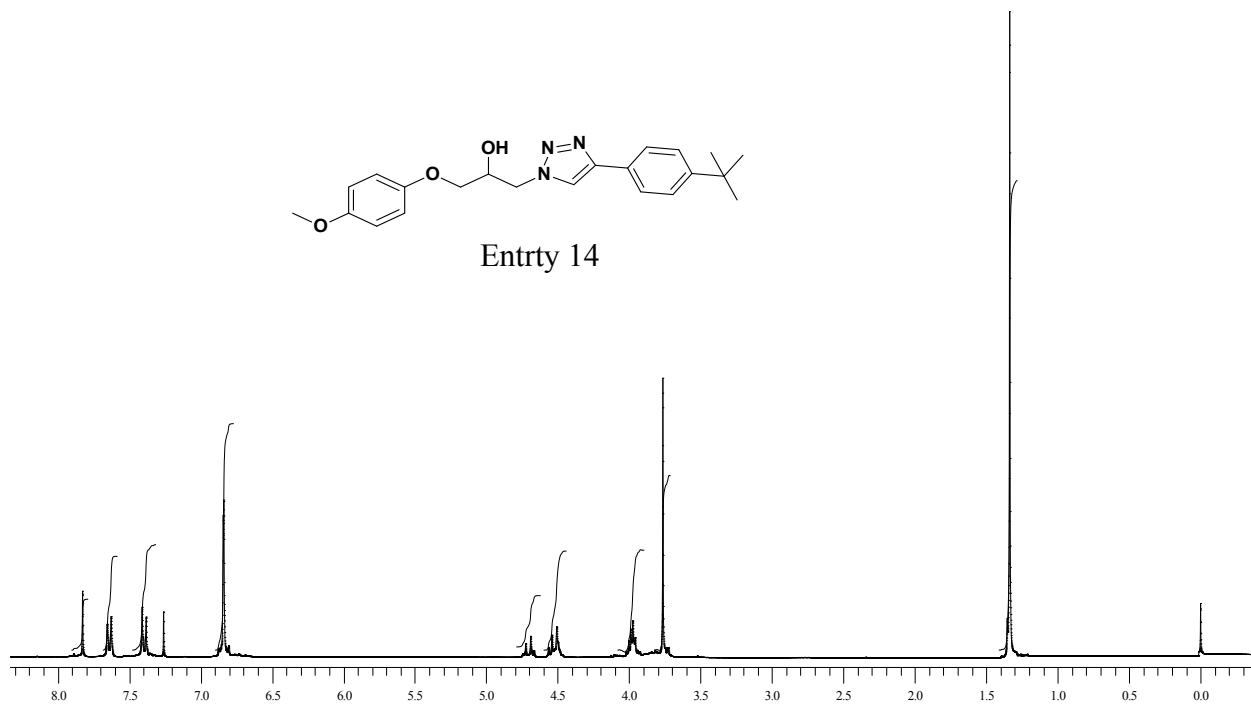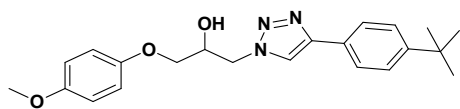

Entry 14

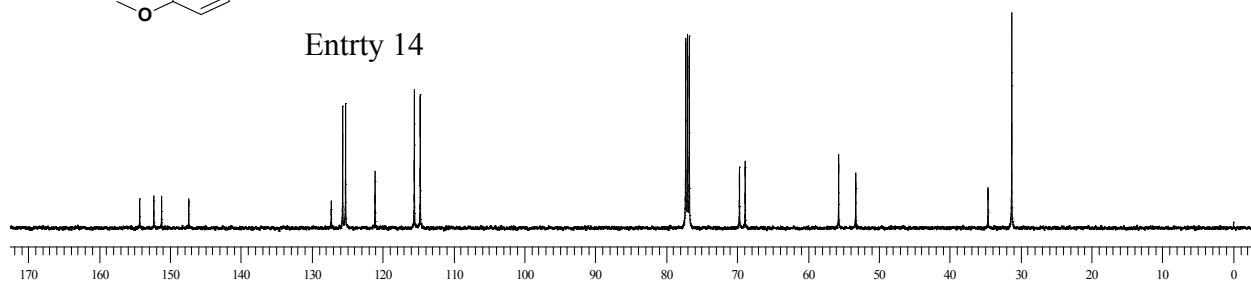

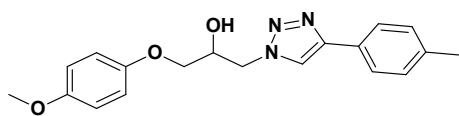

Entry 15

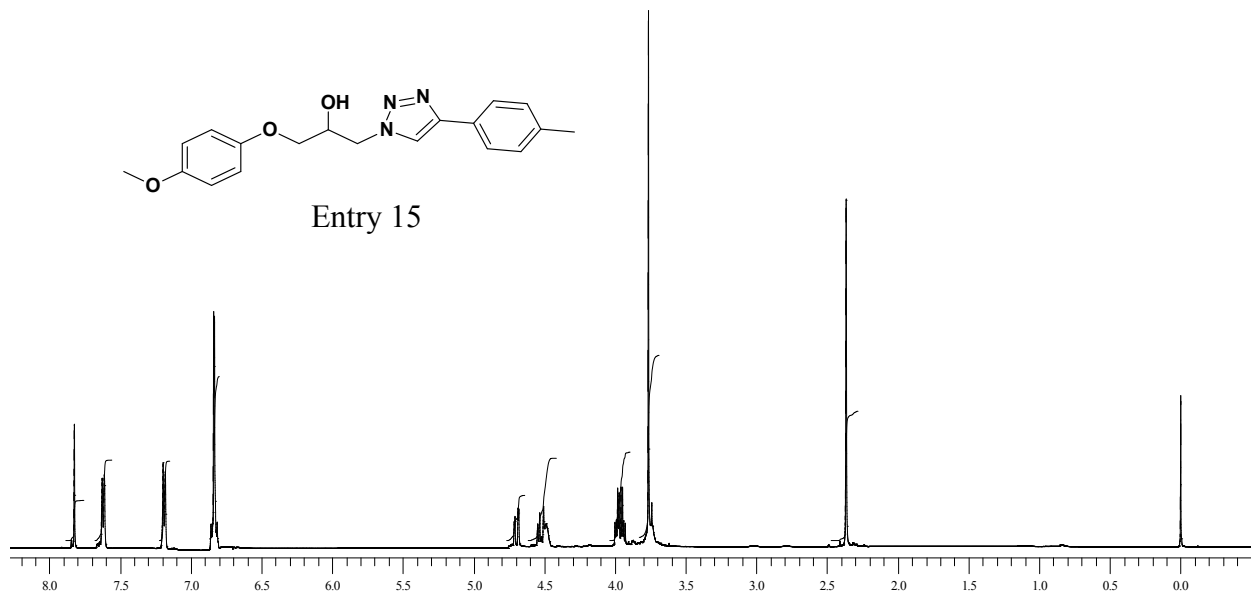



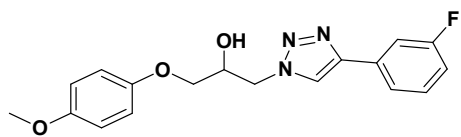

Entry 16

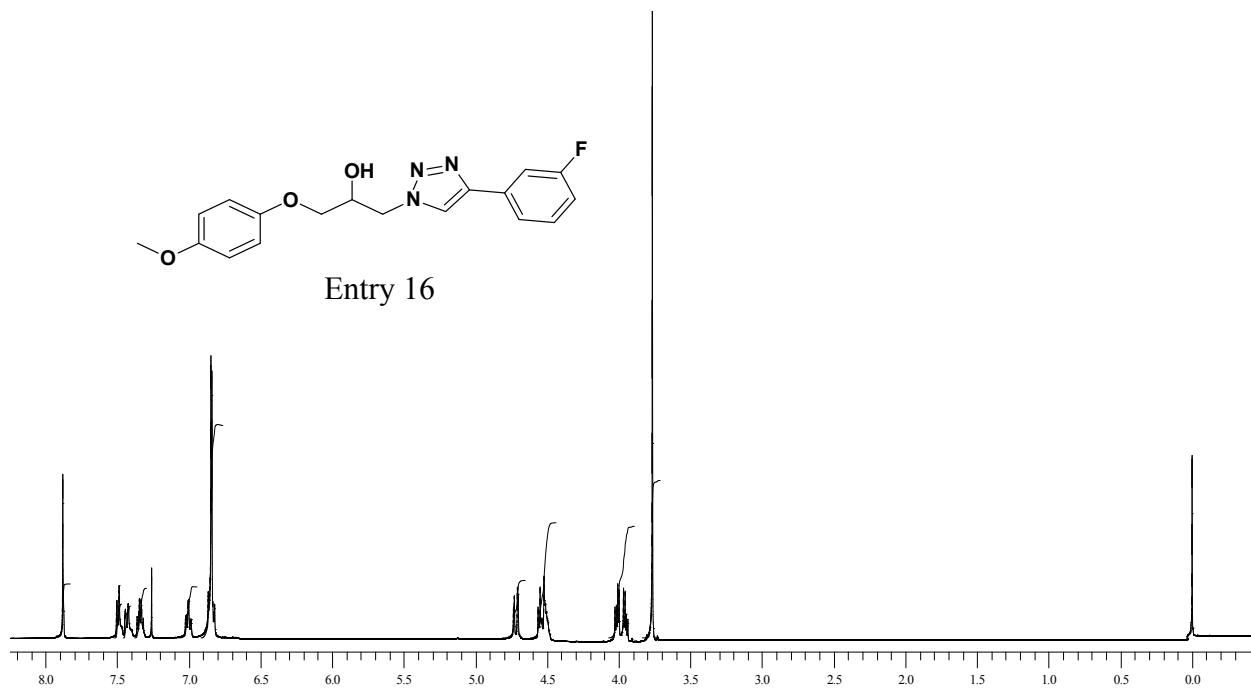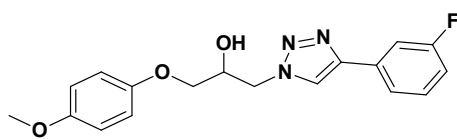

Entry 16

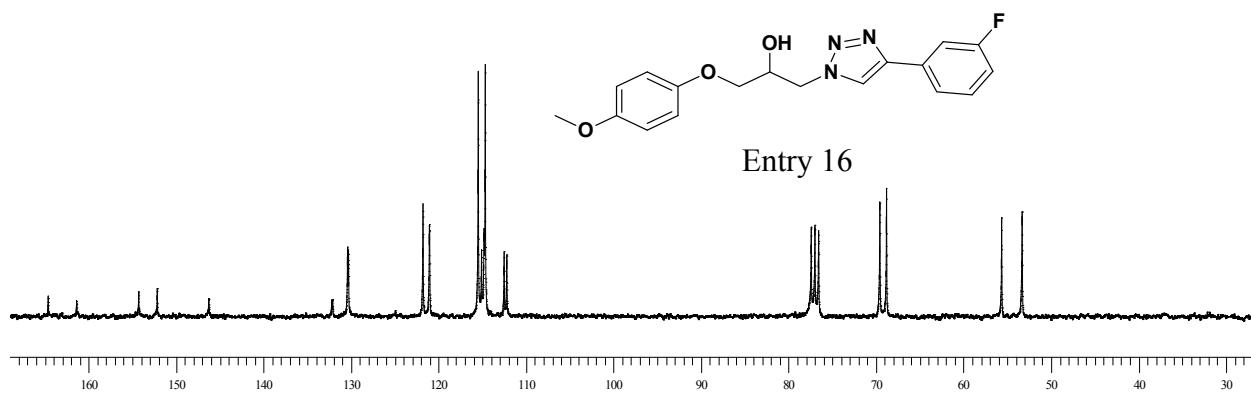

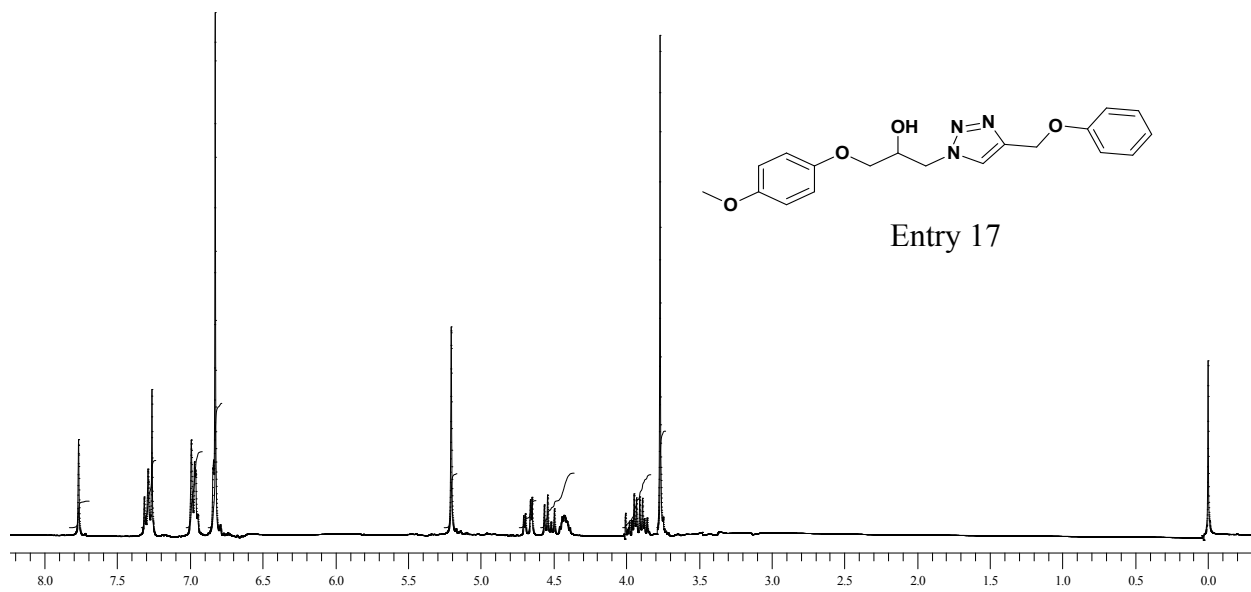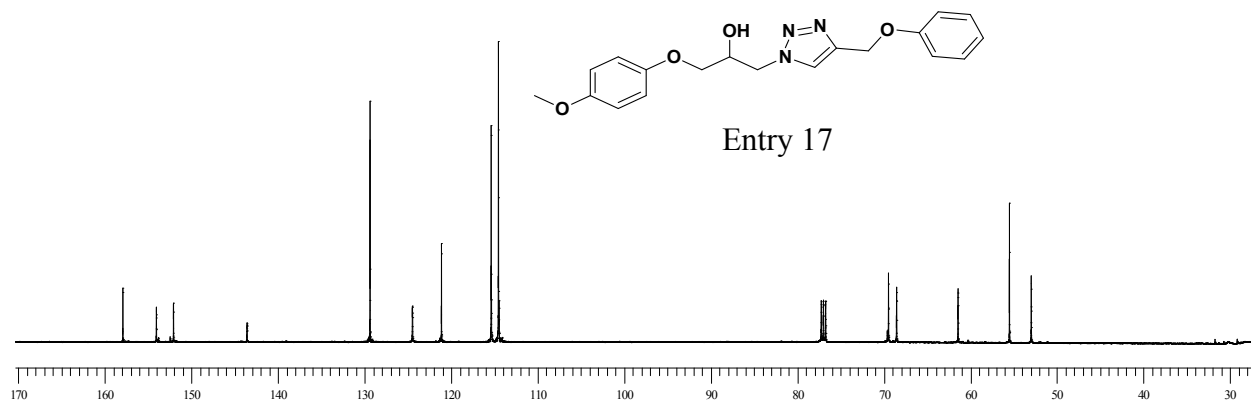

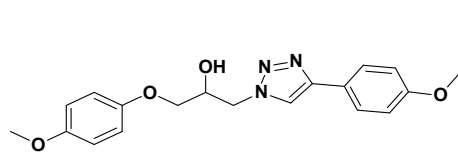

Entry 18

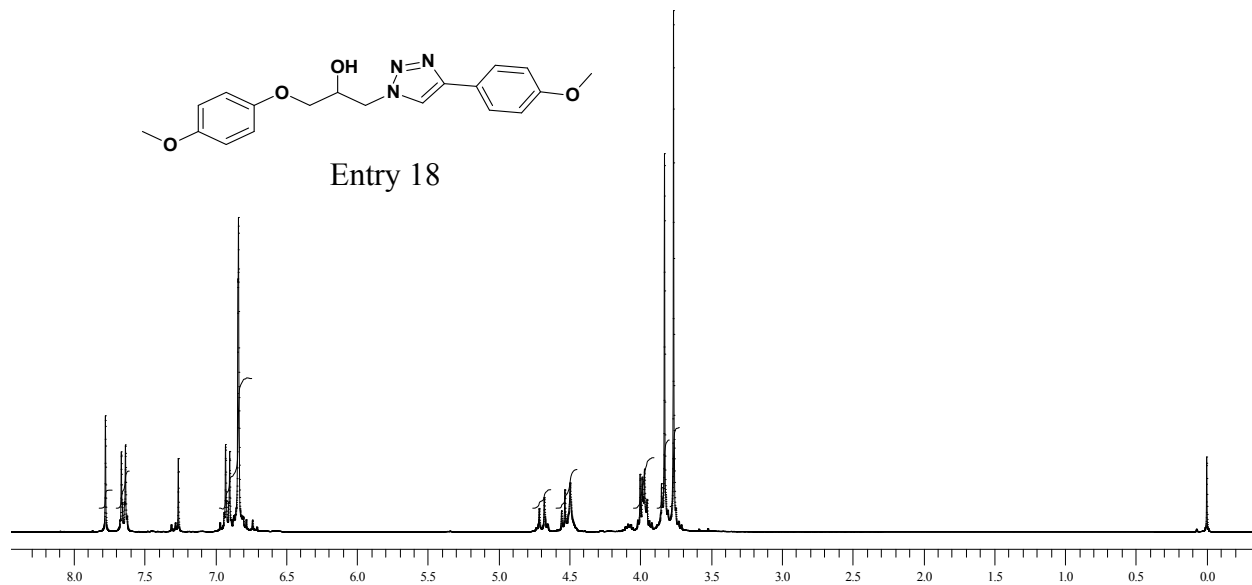

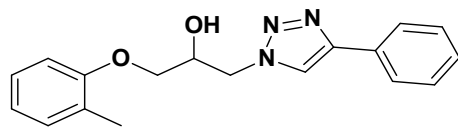

Entry 19

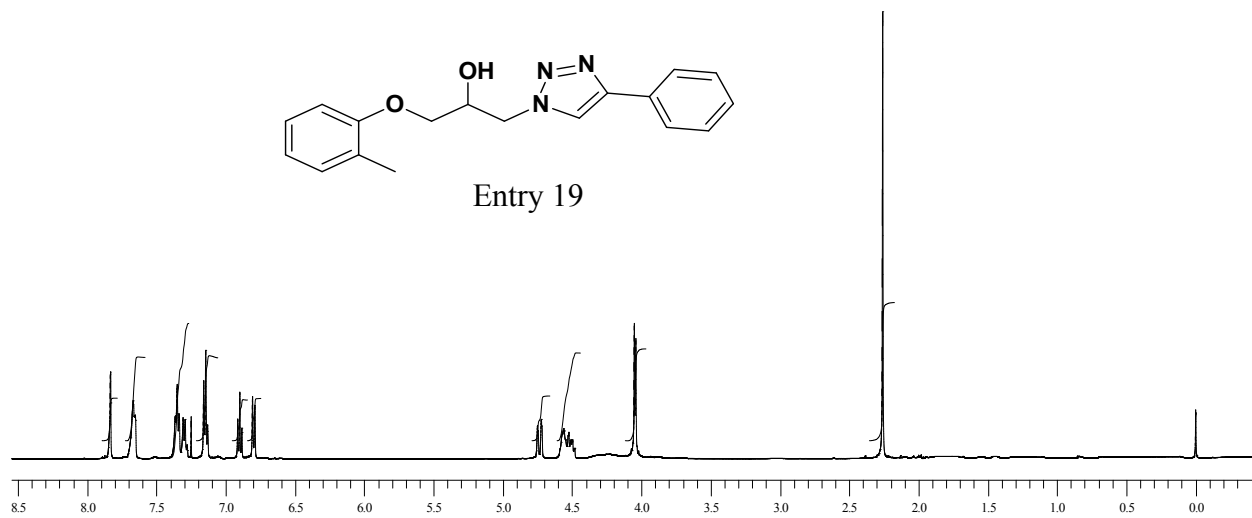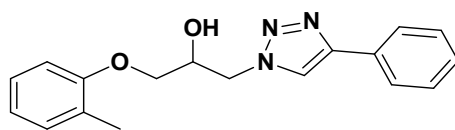

Entry 19

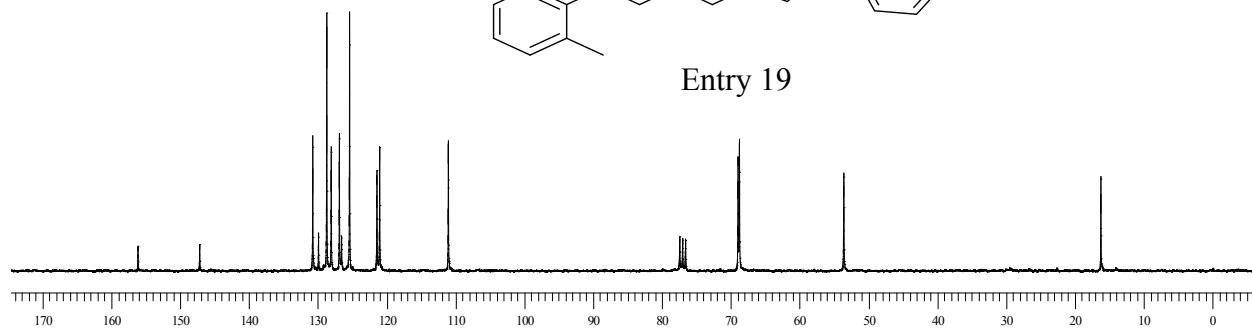

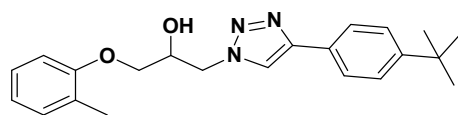

Entry 20

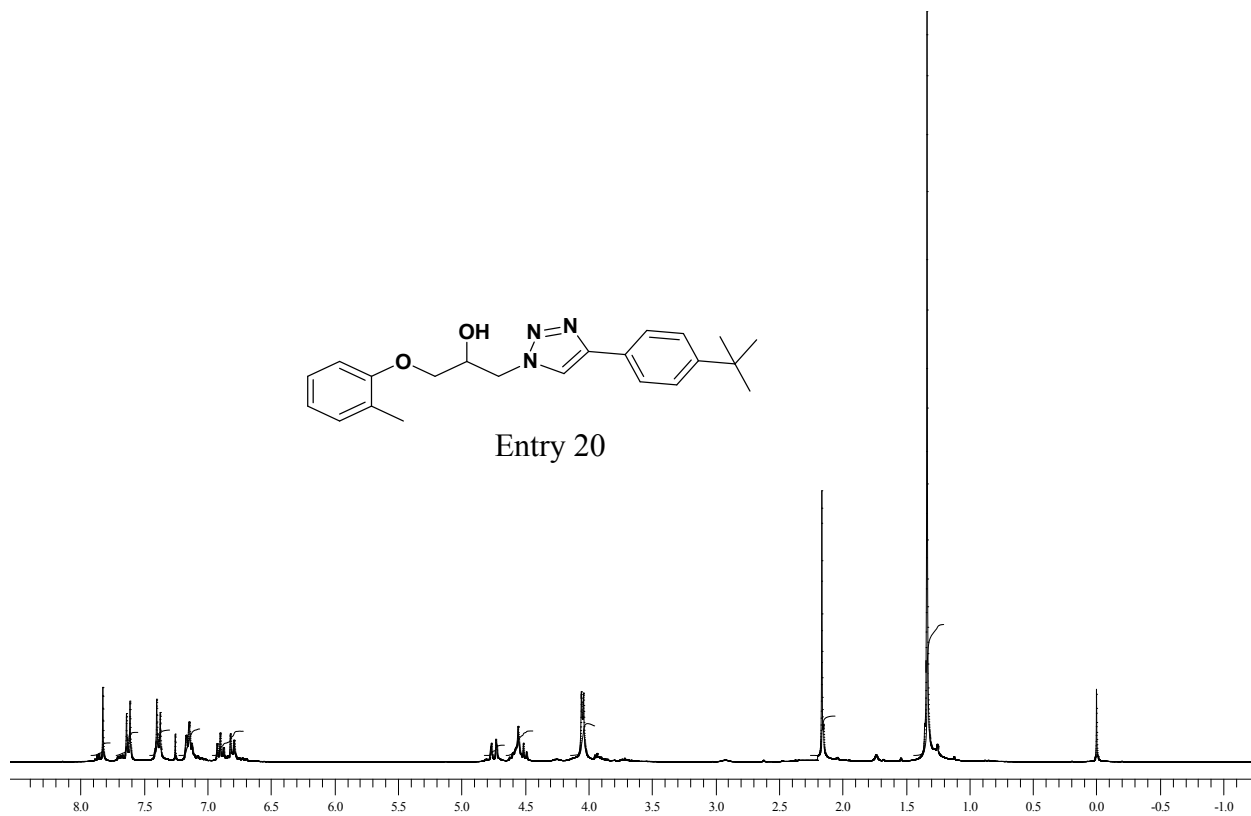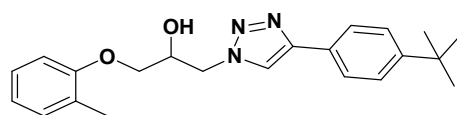

Entry 20

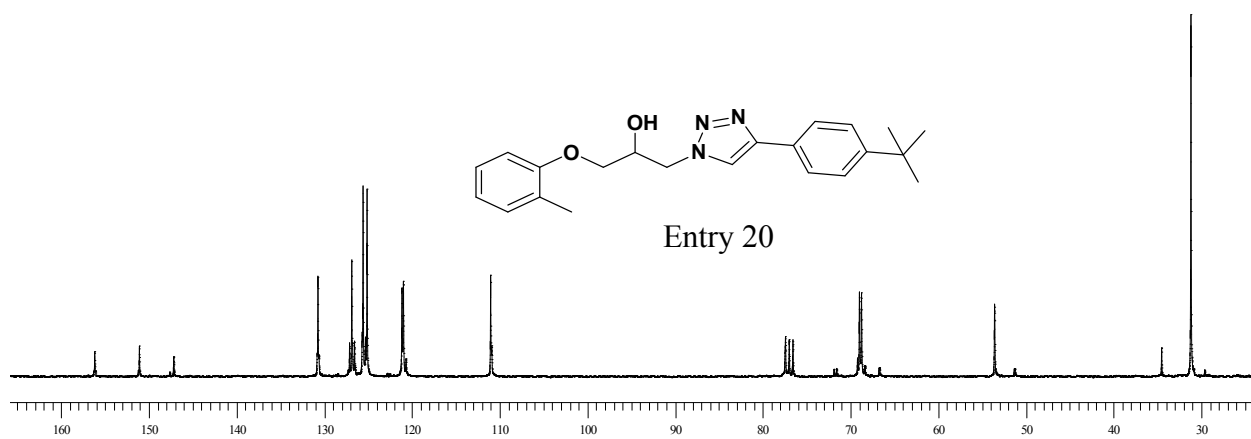

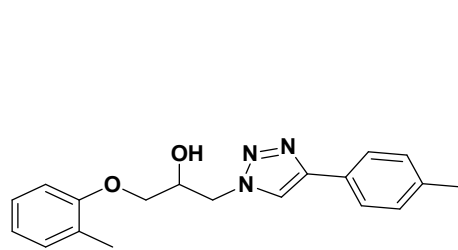

Entry 21

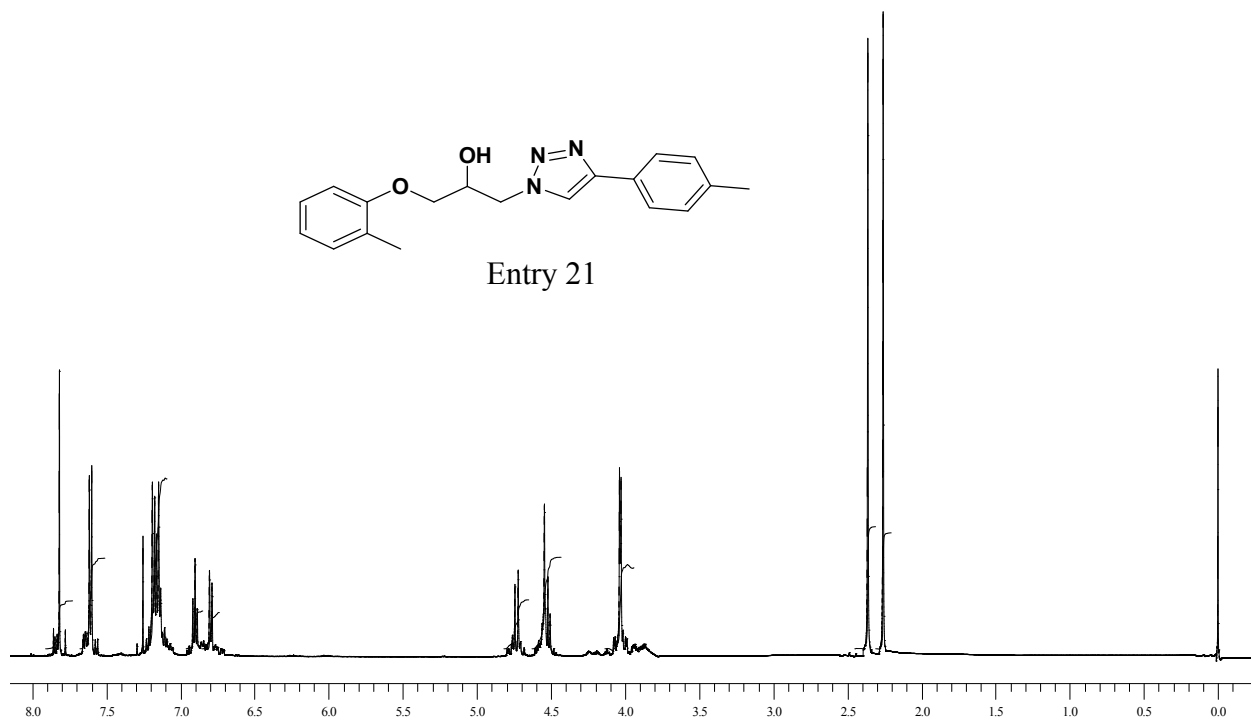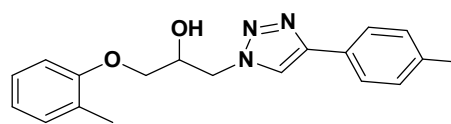

Entry 21

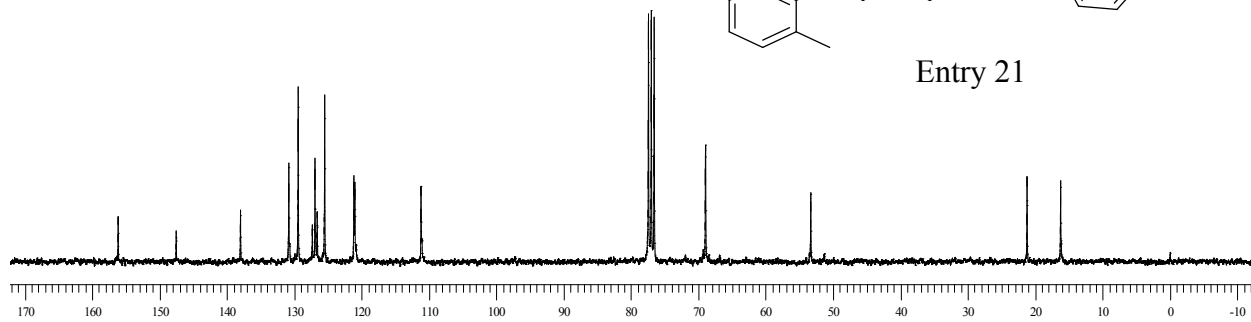

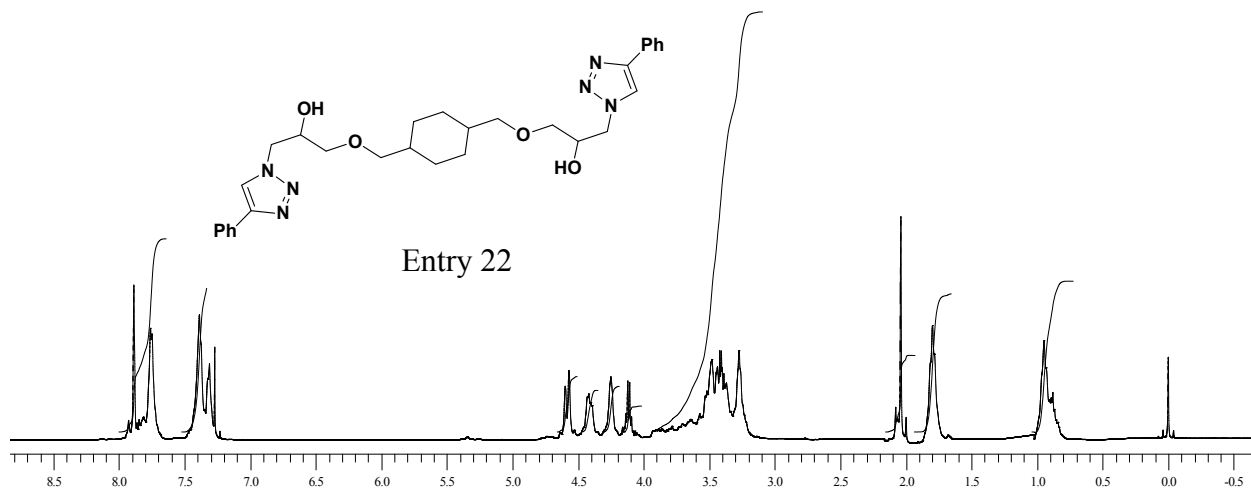

Supplement: c4ra12061b1.pdf [file c4ra12061b1.pdf]
